# Supplementary material for: How Well Do Rodent Models of Parkinson’s Disease Recapitulate Early Non-Motor Phenotypes? A Systematic Review
Source: MDPI journal article supplement (doi:10.3390/biomedicines10123026), 2022-11-24
Supplement: s1 [file s1]

## Supplementary Materials

### Supplementary Table S1

Study characteristics, phenotypic outcomes, and tests performed in genetic PD models used in 3 studies or greater.

| Ref No. | Author, year          | Animal model                                                           | Rodent | Background strain      | Promoter                            | Sex | Age (months) | Outcome                                                                       | Test Performed                                                                                                                                           | Motor or Cell Count tested? |
|---------|-----------------------|------------------------------------------------------------------------|--------|------------------------|-------------------------------------|-----|--------------|-------------------------------------------------------------------------------|----------------------------------------------------------------------------------------------------------------------------------------------------------|-----------------------------|
| [1]     | Griffioen et al, 2013 | <b>A53T</b>                                                            | Mouse  | B6;C3H                 | Thy1                                | M   | 2, 5, 7-11   | ↓ Cardio                                                                      | ECG telemetry                                                                                                                                            | NA                          |
| [2]     | Kuo et al, 2010       | <b>A53T</b><br>PAC crossed with SNCA KO                                | Mouse  | FVB/N<br>129S6/SvEvTac | Endogenous gene regulatory elements | MF  | 3-18         | Olfaction,<br>— 12mo<br><br>GI function,<br>↓ 3-18mo<br><br>Cardio,<br>— 12mo | Non-Social Novel Odour Test,<br>Buried Food Test<br><br>Faecal and water content,<br>Bead expulsion test,<br>Whole gut transit time<br><br>ECG telemetry | Motor,<br>↓ 6-18mo          |
| [3]     | Carboni et al, 2017   | <b>A53T</b>                                                            | Mouse  | B6;C3H                 | PrnP                                | NS  | 7            | ↓ Cognition                                                                   | Novel Object Recognition                                                                                                                                 | ↓ Motor<br>— Cell Count     |
| [4]     | Valek et al, 2021     | <b>A53T</b><br>(Study tested A53T*PINK1 KO but not A53T for olfaction) | Mouse  | FVB/N                  | PrnP                                | NS  | 9            | NA                                                                            | NA                                                                                                                                                       | — Motor                     |
| [5]     | Kuo et al, 2019       | <b>A53T</b><br>PAC crossed with SNCA KO                                | Mouse  | 129S6/SvEvTac          | Endogenous gene regulatory elements | M   | 4, 7, 9      | ↓ GI function                                                                 | Bead Expulsion Test,<br>Whole Gut Transit Time                                                                                                           | Motor,<br>— 7mo             |
| [6]     | Seo et al, 2020       | <b>A53T</b>                                                            | Mouse  | C57BL/6J               | PrnP                                | NS  | 8, 10        | ↓ Olfaction                                                                   | Buried Pellet Test                                                                                                                                       | — Motor                     |
| [7]     | Farrell et al, 2014   | <b>A53T</b>                                                            | Mouse  | C57BL/6J               | PrnP                                | NS  | 12-14        | ↓ Anxiety<br>↓ Olfaction                                                      | Centre of Open Field,<br>Hyponeophagia Test<br>Buried Pellet Test                                                                                        | NA                          |
| [8]     | Wi et al, 2018        | <b>A53T</b>                                                            | Mouse  | C57BL/6J               | PrnP                                | NS  | 8, 10        | ↓ Olfaction                                                                   | Buried Pellet Test                                                                                                                                       | NA                          |

|      |                         |                    |       |         |                                     |    |                                 |                                                                                                        |                                                                                                                                       |                                                          |
|------|-------------------------|--------------------|-------|---------|-------------------------------------|----|---------------------------------|--------------------------------------------------------------------------------------------------------|---------------------------------------------------------------------------------------------------------------------------------------|----------------------------------------------------------|
| [9]  | Zhang et al, 2015       | <b>A53T</b>        | Mouse | B6/C3H  | PrnP                                | M  | 3, 6, 10                        | Olfaction,<br>— 3mo<br>↓ 6, 10mo                                                                       | Block Test (social discrimination),<br>Habituation Dishabituation,<br>Buried Food Test                                                | Motor,<br>— 10mo<br><br>Cell Count,<br>— 10mo            |
| [10] | Gerson et al, 2018      | <b>A53T</b>        | Mouse | B6/C3H  | PrnP                                | MF | 7                               | ↓ Cognition                                                                                            | Novel Object Recognition                                                                                                              | — Motor                                                  |
| [11] | Diwakarla et al, 2021   | <b>A53T</b>        | Mouse | B6/C3H  | PrnP                                | MF | 15-19                           | GI function,<br>↓ 16-19mo                                                                              | Bead Expulsion Test,<br>Whole Gut Transit Time                                                                                        | Motor,<br>↓ 19mo                                         |
| [12] | Diwakarla et al, 2020   | <b>A53T</b>        | Mouse | B6/C3H  | PrnP                                | MF | 5-15                            | GI function,<br>— 5-14mo<br>↓ 15mo                                                                     | Bead Expulsion Test,<br>Whole Gut Transit Time,<br>Faecal and Water Content                                                           | Motor,<br>↓ 8-15mo                                       |
| [13] | Taguchi et al, 2020     | <b>A53T</b><br>BAC | Mouse | C57Bl/6 | Endogenous gene regulatory elements | MF | 3-18                            | Circadian<br>↓ 11, 18mo<br><br>Olfaction,<br>↓ 9mo<br><br>Anxiety,<br>— 9mo<br><br>Cognition,<br>— 9mo | Sleep Recordings<br><br>Urine Odour Test,<br>Olfactory Avoidance Test<br><br>Light Dark Box<br><br>Spatial Recognition<br>Barnes Maze | Motor,<br>— 9mo<br><br>Cell Count,<br>— 3mo<br>↓ 9, 18mo |
| [14] | Li et al, 2021          | <b>A53T</b>        | Mouse | C57Bl/6 | NS                                  | MF | 20                              | ↓ Cognition<br><br>↓ Olfaction                                                                         | Fear Conditioning<br><br>Olfactory Bedding Test                                                                                       | ↓ Motor<br><br>↓ Cell Count                              |
| [15] | Do et al, 2021          | <b>A53T</b>        | Mouse | C57BL/6 | PrnP                                | MF | 8, 10, 12, 14, 16 monthly to 23 | Cognition,<br>— 8-23mo<br><br>Olfaction,<br>— 8-23mo                                                   | Novel Object Recognition<br><br>Buried Pellet Test                                                                                    | Motor,<br>↓ 8-23mo                                       |
| [16] | Stanojlovic et al, 2019 | <b>A53T</b>        | Mouse | C57BL/6 | NS                                  | M  | 3, 5, 7                         | ↓ Cognition                                                                                            | Barnes Maze,<br>Contextual Object Recognition                                                                                         | NA                                                       |
| [17] | Graham et al, 2010      | <b>A53T</b>        | Mouse | B6/C3H  | PrnP                                | NS | 2, 8, 12                        | Anxiety,<br>↓ 2mo<br>— 8mo<br>↑ 12mo                                                                   | Elevated Plus Maze                                                                                                                    | Motor,<br>↓ 2mo<br>— 8mo<br>↑ 12mo                       |
| [18] | Costa et al, 2020       | <b>A53T</b>        | Mouse | B6/C3H  | PrnP                                | MF | 12                              | ↓ Olfaction<br>↓ GI function                                                                           | Buried Pellet Test<br>Faecal Pellet Output                                                                                            | — Motor<br>↓ Cell Count                                  |

|      |                            |                                                |       |         |      |    |                                     |                                                                                                    |                                                                              |                                   |
|------|----------------------------|------------------------------------------------|-------|---------|------|----|-------------------------------------|----------------------------------------------------------------------------------------------------|------------------------------------------------------------------------------|-----------------------------------|
|      |                            |                                                |       |         |      |    |                                     | ↓ Cognition                                                                                        | Novel Object Recognition,<br>Spontaneous Alternation                         |                                   |
| [19] | Peters et al,<br>2020      | <b>A53T</b>                                    | Mouse | C57Bl/6 | PrnP | MF | 3-4, 6-7,<br>9-10                   | Circadian,<br>↓ 3-10mo                                                                             | EMG/EEG Recordings                                                           | NA                                |
| [20] | Paumier et al,<br>2013     | <b>A53T</b>                                    | Mouse | C57BL/6 | PrnP | M  | 2, 6, 12                            | Cognition,<br>— 2mo<br>↓ 6, 12mo<br><br>Anxiety,<br>— 2mo<br>↑ 6, 12mo                             | Spatial Recognition<br><br>Centre of Open Field                              | Motor,<br>↑ 2, 6, 12mo            |
| [21] | Thom et al,<br>2022        | <b>A53T</b><br>crossed with<br>cellular Prp KO | Mouse | C57Bl/6 | PrnP | M  | 9, 18                               | Anxiety,<br>↓ 9, 18mo                                                                              | Elevated Plus Maze                                                           | Motor,<br>— 18mo                  |
| [22] | Singh et al,<br>2019       | <b>A53T</b>                                    | Mouse | C57Bl/6 | PrnP | M  | 6, 12                               | ↓ Cognition                                                                                        | Barnes Maze,<br>Spatial Recognition<br>Fear Conditioning                     | ↑ Motor                           |
| [23] | Pfeffer et al,<br>2018     | <b>A53T</b>                                    | Mouse | FVB/N   | PrnP | M  | 4-6                                 | ↓ Circadian                                                                                        | Re-entrainment test                                                          | — Motor                           |
| [24] | Zhang et al,<br>2018       | <b>A53T</b>                                    | Mouse | NS      | PrnP | M  | 12                                  | ↓ Cognition                                                                                        | Novel Object Recognition,<br>Spatial Recognition                             | ↓ Motor                           |
| [25] | Rockenstein<br>et al, 2016 | <b>A53T</b>                                    | Mouse | C57Bl/6 | PrnP | NS | 2                                   | ↓ Cognition<br><br>— Anxiety                                                                       | Fear Conditioning<br><br>Centre of Open Field                                | ↑ Motor                           |
| [26] | West et al,<br>2020        | <b>A53T</b>                                    | Mouse | C57BL/6 | PrnP | M  | 7                                   | ↓ GI Function                                                                                      | In vitro colonic monitoring,<br>Faecal Pellet Output                         | NA                                |
| [27] | Noorian et al,<br>2012     | <b>A53T</b>                                    | Mouse | FVB/N   | PrnP | MF | 2-3, 8-<br>10, 14-<br>16, 18-<br>20 | GI Function,<br>— 2, 9mo<br>↓ 15-20mo                                                              | Faecal Pellet Output,<br>Gastric Emptying                                    | NA                                |
| [28] | Tikhonova et<br>al, 2020   | <b>A53T</b>                                    | Mouse | C57Bl/6 | PrnP | M  | 6-8                                 | ↓ Cognition                                                                                        | Passive Avoidance Test,<br>Spontaneous Alternation,<br>Barnes Maze           | ↑ Motor                           |
| [29] | Wang et al,<br>2018        | <b>A53T</b>                                    | Mouse | B6/C3H  | PrnP | M  | 3, 6, 9,<br>12                      | GI Function,<br>↓ 3, 6, 9mo<br>↑ 12mo<br><br>Depression,<br>— 3mo<br>↓ 6mo<br>↓ Anxiety,<br>3, 6mo | Faecal Pellet Output<br><br>Tail Suspension Test<br><br>Centre of Open Field | Motor,<br>↑ 3, 6 mo<br>— 9, 12 mo |

|      |                            |                               |       |               |      |    |                           |                                                                               |                                                                       |                                 |
|------|----------------------------|-------------------------------|-------|---------------|------|----|---------------------------|-------------------------------------------------------------------------------|-----------------------------------------------------------------------|---------------------------------|
| [30] | Li et al, 2020             | <b>A53T</b>                   | Mouse | B6/C3H        | PrnP | M  | 3, 6, 9, 12               | Anxiety,<br>— 3mo<br>↓ 6, 9, 12mo<br><br>Depression,<br>— 3mo<br>↓ 6, 9, 12mo | Elevated Plus Maze<br><br>Tail Suspension Test,<br>Forced Swim Test   | Motor,<br>— 3, 6, 9mo<br>↓ 12mo |
| [31] | Rota et al, 2019           | <b>A53T</b>                   | Mouse | C57Bl/6       | PrnP | MF | 3, 6, 9, 12, 14           | GI function,<br>↓ 3-12mo                                                      | Whole Gut Transit Time,<br>Faecal Pellet Output                       | Motor,<br>— 3, 6mo              |
| [32] | Kim et al, 2014            | <b>A53T</b>                   | Mouse | NS            | PrnP | NS | 14-15                     | ↓ Anxiety                                                                     | Light Dark Box,<br>Elevated Plus Maze                                 | — Motor                         |
| [33] | Vidal-Martinez et al, 2016 | <b>A53T</b>                   | Mouse | B6/C3H        | PrnP | NS | 1-15                      | GI function,<br>— 1-5mo<br>↓ 6-15mo                                           | Faecal Pellet Output,<br>Whole Gut Transit Time                       | NA                              |
| [34] | Huang et al, 2019          | <b>A53T</b>                   | Mouse | NS            | PrnP | NS | 12                        | ↓ Cognition                                                                   | Spatial Recognition                                                   | ↓ Motor                         |
| [35] | Finkelstein et al, 2016    | <b>A53T</b>                   | Mouse | C57BL/6       | PrnP | NS | 8                         | ↓ Cognition                                                                   | Morris Water Maze,<br>Spatial Recognition<br>Novel Object Recognition | ↓ Motor<br><br>↓ Cell Count     |
| [36] | Oaks et al, 2013           | <b>A53T</b>                   | Mouse | B6/C3H        | PrnP | NS | 2, 4, 8, 12               | Depression,<br>— 2, 12mo<br>↑ 4-8mo<br><br>Anxiety,<br>— 2, 4, 8mo<br>↑ 12mo  | Forced Swim Test<br><br>Elevated Plus Maze                            | Motor,<br>↓ 2-12mo              |
| [37] | Sardi et al, 2017          | <b>A53T</b>                   | Mouse | B6/C3H        | PrnP | NS | 4, 8                      | ↓ Cognition,<br>4, 8mo                                                        | Novel Object Recognition,<br>Fear Conditioning                        | NA                              |
| [38] | Wu et al, 2016             | <b>A53T</b>                   | Mouse | B6/C3H        | PrnP | MF | 7                         | — Depression<br><br>— Olfaction                                               | Sucrose Preference Test<br><br>Buried Pellet Test                     | ↓ Motor                         |
| [39] | Rothman et al, 2013        | <b>A53T</b>                   | Mouse | C57Bl/6       | Thy1 | M  | 3-7                       | Circadian,<br>↓ 3mo<br><br>Anxiety,<br>↑ 3-6mo                                | Circadian Monitoring System<br><br>Elevated Plus Maze                 | Motor,<br>↓ 3-7mo               |
| [40] | Tatenhorst et al, 2016     | <b>A53T</b>                   | Mouse | B6            | PrnP | NS | 6, motor impairment onset | Cognition,<br>— 6mo<br>↓ ~16mo                                                | Novel Object Recognition                                              | Motor,<br>— 1-6mo<br>↓ ~16mo    |
| [25] | Rockenstein et al, 2016    | <b>Ha-syn OE</b><br>Thy1-asyn | Mouse | C57Bl/6-DBA/2 | Thy1 | F  | 6, 9                      | Anxiety,<br>↑ 6, 9mo                                                          | Centre of Open Field                                                  | Motor,<br>↑ 6, 9mo              |

|      |                            |                                                  |       |                   |                                              |    |                                                   |                                                              |                                                                                                                |                                                |
|------|----------------------------|--------------------------------------------------|-------|-------------------|----------------------------------------------|----|---------------------------------------------------|--------------------------------------------------------------|----------------------------------------------------------------------------------------------------------------|------------------------------------------------|
|      |                            |                                                  |       |                   |                                              |    |                                                   | Olfaction,<br>↓9mo                                           | Buried Pellet Test                                                                                             |                                                |
| [41] | Hallett et al,<br>2012     | <b>Ha-syn OE</b><br>Thy1-asyn                    | Mouse | C57BL/6-<br>DBA/2 | Thy1                                         | M  | 2-4, 12-<br>15                                    | GI Function,<br>— 2-4mo<br>↓ 9-12                            | Faecal Pellet Output,<br>Whole Gut Transit Time                                                                | Motor,<br>↓ 12-15mo                            |
| [42] | Yamakado et al,<br>2012    | <b>Ha-syn OE</b><br>a-syn BAC                    | Mouse | NS                | Endogenous<br>gene<br>regulatory<br>elements | NS | 12-13,<br>24                                      | Cognition,<br>— 12, 24mo<br><br>Anxiety,<br>↑13mo,<br>— 24mo | Radial Maze Test,<br>Barnes Maze Test,<br>Fear Conditioning<br><br>Elevated Plus Maze,<br>Centre of Open Field | Motor,<br>↑ 13mo<br><br>Cell Count,<br>— 24mo  |
| [43] | Mandler et al,<br>2014     | <b>Ha-syn OE</b><br>1) Thy1-asyn<br>2) PDGF-asyn | Mouse | NS                | Thy1,<br>PDGF- $\beta$                       | NS | 9-10<br>(Thy-1<br>asyn),<br>12<br>(PDGF-<br>asyn) | Cognition,<br>↓ 12 mo<br>(PDGF-asyn)                         | Morris Water Maze                                                                                              | Motor,<br>↓ 9-12 (Thy1-<br>asyn)               |
| [44] | Wassouf et al,<br>2018     | <b>Ha-syn OE</b><br>Asyn BAC                     | Mouse | C57BL/6           | Endogenous<br>gene<br>regulatory<br>elements | MF | 6                                                 | Anxiety,<br>↓ 6mo                                            | Light Dark Box,<br>Elevated Plus Maze                                                                          | Motor,<br>— 6mo<br>↓ 13, 20mo                  |
| [45] | Subramaniam<br>et al, 2018 | <b>Ha-syn OE</b><br>Thy1-asyn                    | Mouse | C57BL6/DBA<br>/2  | Thy1                                         | M  | 2, 4, 8                                           | Cognition,<br>— 5mo<br>↓ 6-7mo                               | Spontaneous Alternation<br>Novel Object Recognition                                                            | Motor,<br>↓ 2, 4, 6, 8mo                       |
| [46] | Brown et al,<br>2021       | <b>Ha-syn OE</b><br>Thy1-asyn                    | Mouse | BDF-1             | Thy1                                         | M  | 1, 3                                              | Olfaction,<br>↓ 1mo<br>— 3mo                                 | Buried Pellet Test                                                                                             | Motor,<br>↓ 1, 3mo<br><br>Cell Count,<br>— 3mo |
| [47] | Games et al,<br>2014       | <b>Ha-syn OE</b><br>Thy1-asyn                    | Mouse | C57Bl/6-<br>DBA/2 | Thy1                                         | F  | 12                                                | ↓ Cognition                                                  | Morris Water Maze                                                                                              | ↓ Motor<br><br>— Cell Count                    |
| [48] | Schwab et al,<br>2017      | <b>Ha-syn OE</b><br>H-asynL62                    | Mouse | C57Bl/6           | Thy1                                         | MF | 5.5                                               | ↓ Anxiety                                                    | Light Dark Box                                                                                                 | NA                                             |
| [49] | Wang et al,<br>2012        | <b>Ha-syn OE</b><br>Thy1-asyn                    | Mouse | C57BL/6-<br>DBA/2 | Thy1                                         | M  | 2-5, 7-<br>10, 12-<br>14, 18                      | GI Function,<br>↓ 2-3, 7-8 mo<br>— 4-5, 9-10,<br>12-14, 18mo | Faecal Pellet Output,<br>Gastric Emptying                                                                      | Motor,<br>↑ 4-5mo                              |

|      |                      |                               |       |               |      |    |                 |                                                           |                                                                                                                       |                                                          |
|------|----------------------|-------------------------------|-------|---------------|------|----|-----------------|-----------------------------------------------------------|-----------------------------------------------------------------------------------------------------------------------|----------------------------------------------------------|
|      |                      |                               |       |               |      |    |                 | Anxiety,<br>↑ 4-5mo                                       | Centre of Open Field                                                                                                  |                                                          |
| [50] | McDowell et al, 2014 | <b>Ha-syn OE</b><br>Thy1-asyn | Mouse | C57BL/6-DBA/2 | Thy1 | M  | 9.5-10.5        | ↓ Circadian                                               | EEG/EMG Recordings                                                                                                    | NA                                                       |
| [51] | Bermudez et al, 2019 | <b>Ha-syn OE</b><br>Thy1-asyn | Mouse | BDF1          | Thy1 | M  | 2, 4            | Olfaction,<br>↓ 2mo<br>— 4mo                              | Buried Pellet Test                                                                                                    | Motor,<br>↓ 2, 4mo                                       |
| [52] | Biju et al, 2020     | <b>Ha-syn OE</b><br>Thy1-asyn | Mouse | C57Bl/6       | Thy1 | M  | 18              | ↓ Olfaction                                               | Buried Pellet Test                                                                                                    | ↓ Motor                                                  |
| [53] | Fleming et al, 2008  | <b>Ha-syn OE</b><br>Thy1-asyn | Mouse | C57BL/6-DBA/2 | Thy1 | M  | 3-4, 5-6, 9, 11 | ↓ Olfaction                                               | Buried Pellet Test,<br>Block Test,<br>Habituation/Dishabituation                                                      | NA                                                       |
| [54] | Fleming et al, 2011  | <b>Ha-syn OE</b><br>Thy1-asyn | Mouse | C57BL/6-DBA/2 | Thy1 | M  | 3-4             | ↓ Olfaction                                               | Buried Pellet Test                                                                                                    | ↓ Motor                                                  |
| [55] | Fleming et al, 2013  | <b>Ha-syn OE</b><br>Thy1-asyn | Mouse | C57BL/6-DBA/2 | Thy1 | M  | 3-5, 9-12       | ↓ Cardio                                                  | Telemetry                                                                                                             | NA                                                       |
| [56] | Magen et al, 2012    | <b>Ha-syn OE</b><br>Thy1-asyn | Mouse | C57BL/6-DBA/2 | Thy1 | M  | 3-9, 11-13      | Cognition,<br>— 3, 11-13mo<br>↓ 5-9mo                     | Spontaneous Alternation,<br>One-trial Object-Place Recognition,<br>Novel Object Recognition,<br>Operant Learning Task | NA                                                       |
| [57] | Torres et al, 2021   | <b>Ha-syn OE</b><br>Thy1-asyn | Mouse | C57Bl/6-DBA/2 | Thy1 | M  | 3-4             | ↑ Cognition<br><br>— Anxiety                              | Fear Conditioning<br><br>Centre of Open Field                                                                         | — Motor                                                  |
| [21] | Thom et al, 2022     | <b>Ha-syn OE</b><br>Thy1-asyn | Mouse | C57Bl/6       | Thy1 | M  | 9               | ↓ Cognition<br><br>↑ Anxiety                              | Novel Object Recognition,<br>Fear conditioning<br><br>Elevated Plus Maze                                              | — Motor                                                  |
| [58] | Wang et al, 2008     | <b>Ha-syn OE</b><br>Thy1-asyn | Mouse | C57Bl/6-DBA/2 | Thy1 | M  | 11-12           | ↓ GI Function                                             | Bead Expulsion Test, Faecal Pellet Output                                                                             | NA                                                       |
| [59] | Li et al, 2022       | <b>Ha-syn OE</b><br>Thy1-asyn | Mouse | C57Bl/6       | Thy1 | M  | 6, 7, 9, 12     | Olfaction,<br>↓ 6, 7, 9, 12mo<br><br>Depression,<br>— 7mo | Buried Pellet Test,<br>Block Test<br><br>Sucrose Preference Test                                                      | Motor,<br>— 6, 9mo<br>↓ 12mo<br><br>Cell Count<br>↓ 12mo |
| [60] | Grant et al, 2014    | <b>Ha-syn OE</b><br>Thy1-asyn | Mouse | C57BL/6-DBA/2 | Thy1 | M  | 2-3, 6-7, 9     | ↓ Cognition                                               | USV Recordings                                                                                                        | NA                                                       |
| [61] | Keane et al, 2019    | <b>A30P</b>                   | Mouse | C57Bl/6       | NS   | MF | 3, 13           | Cognition,<br>— 13mo                                      | Barnes Maze                                                                                                           | Motor,<br>— 3-12mo                                       |

|      |                            |                                            |       |                                    |                                              |    |                   |                                                                          |                                                                         |                                              |
|------|----------------------------|--------------------------------------------|-------|------------------------------------|----------------------------------------------|----|-------------------|--------------------------------------------------------------------------|-------------------------------------------------------------------------|----------------------------------------------|
|      |                            |                                            |       |                                    |                                              |    |                   |                                                                          |                                                                         | Cell Count,<br>↓ 13mo                        |
| [2]  | Kuo et al,<br>2010         | <b>A30P</b><br>PAC crossed<br>with SNCA KO | Mouse | NS                                 | Endogenous<br>gene<br>regulatory<br>elements | MF | 6-12              | GI function,<br>↓ 3-18mo                                                 | Faecal Pellet Output,<br>Bead Expulsion Test,<br>Whole Gut Transit Time | Motor,<br>— 6, 12mo                          |
| [62] | Gureviciene<br>et al, 2009 | <b>A30P</b>                                | Mouse | C57Bl/6                            | PrnP                                         | M  | 7-9, 22-<br>25    | Cognition,<br>— 7-9, 22-<br>24mo                                         | Morris Water Maze                                                       | Motor,<br>— 7-9mo,<br>↓ 22-24mo              |
| [5]  | Kuo et al,<br>2019         | <b>A30P</b><br>PAC crossed<br>with SNCA KO | Mouse | 29S6/SvEvTa<br>c_FVB/N_C57<br>/BL6 | Endogenous<br>gene<br>regulatory<br>elements | M  | 4, 7, 9           | ↓ GI Function                                                            | Bead Expulsion                                                          | — Motor                                      |
| [22] | Singh et al,<br>2019       | <b>A30P</b>                                | Mouse | C57Bl/6                            | PrnP                                         | M  | 12                | — Cognition                                                              | Spatial Recognition                                                     | NA                                           |
| [63] | Marxreiter et<br>al, 2013  | <b>A30P</b><br>Tet regulated               | Mouse | NS                                 | CaMK                                         | M  | 2                 | ↓ Anxiety                                                                | TMT-induced Fear,<br>Elevated Plus Test                                 | — Motor                                      |
| [64] | Schell et al,<br>2012      | <b>A30P</b>                                | Mouse | NS                                 | Thy1                                         | M  | 6-18              | Cognition,<br>↓ 6, 16mo                                                  | Fear Conditioning                                                       | NA                                           |
| [65] | Neuner et al,<br>2014      | <b>A30P</b>                                | Mouse | C57Bl/6                            | Thy1                                         | NS | 6-8               | Olfaction,<br>↓ 6mo<br><br>Cognition,<br>— 8mo                           | Olfactory Discrimination<br>Test (with cognitive<br>component)          | NA                                           |
| [66] | Freichel et al,<br>2007    | <b>A30P</b>                                | Mouse | C57Bl/6                            | Thy1                                         | NS | 4, 9-15,<br>16-18 | Cognition,<br>— 4mo<br>↓ 12mo                                            | Morris Water Maze,<br>Fear Conditioning,<br>Active Avoidance Test       | Motor,<br>— 4, 9-15mo<br>↑ 12mo<br>↓ 16-18mo |
| [67] | Stylianou et<br>al, 2020   | <b>A30P</b>                                | Mouse | C57Bl/6                            | Thy1                                         | M  | 2.5-4             | ↓ Circadian                                                              | In vivo recordings in PFC,<br>CA1 hip                                   | NA                                           |
| [68] | Gries et al,<br>2021       | <b>A30P</b>                                | Mouse | C57Bl/6                            | Thy1                                         | MF | 2, 12-13          | GI Function,<br>↓ 2mo                                                    | GI motility recording in<br>organ bath                                  | Motor,<br>— 2mo<br>↓ 12-13mo                 |
| [69] | Langley et al,<br>2021     | <b>Mitopark</b>                            | Mouse | NS                                 | Dopamine<br>Transporter<br>(DAT)             | MF | 1-5               | Olfaction,<br>— 1-2mo<br>↓ 3-5mo<br><br>Cognition,<br>— 1-2mo<br>↓ 3-5mo | Social and Novel Scent Test<br><br>Morris Water Maze                    | Motor,<br>— 1-2mo<br>↓ 3-5mo                 |

|      |                        |                 |       |         |                                                                                                |    |                       |                                                                                                      |                                                                                              |                              |
|------|------------------------|-----------------|-------|---------|------------------------------------------------------------------------------------------------|----|-----------------------|------------------------------------------------------------------------------------------------------|----------------------------------------------------------------------------------------------|------------------------------|
|      |                        |                 |       |         |                                                                                                |    |                       | Depression,<br>— 1-2mo<br>↓ 3-5mo<br><br>Anxiety,<br>— 1-2mo<br>↓ 3-5mo<br><br>Circadian,<br>— 1-5mo | Force Swim Test,<br>Tail Suspension Test<br><br>Elevated Plus Maze<br><br>Sleep Latency Test |                              |
| [70] | Li et al, 2013         | <b>Mitopark</b> | Mouse | C57Bl/6 | DAT                                                                                            | MF | 1-5                   | Cognition,<br>↓ 1mo                                                                                  | Barnes Maze,<br>Novel Object Recognition                                                     | Motor,<br>— 1-2mo<br>↓ 3-5mo |
| [71] | Cong et al,<br>2016    | <b>Mitopark</b> | Mouse | C57Bl/6 | DAT                                                                                            | MF | 5-7                   | Cognition,<br>↓ 5-6mo<br><br>Depression<br>↓ 5-6mo                                                   | Novel Object Recognition<br><br>Tail Suspension Test                                         | Motor,<br>↓ 7mo              |
| [72] | Ghaisas et al,<br>2019 | <b>Mitopark</b> | Mouse | C57BL/6 | DAT                                                                                            | MF | 2-5                   | GI Function,<br>↓ 3-5mo                                                                              | Gastric Emptying,<br>Whole Gut Transit Time,<br>Bead Expulsion Test                          | NA                           |
| [73] | Fifel et al,<br>2014   | <b>Mitopark</b> | Mouse | NS      | DAT                                                                                            | NS | 2-6                   | Circadian,<br>— 2mo<br>↓ 6mo                                                                         | Re-entrainment Test                                                                          | NA                           |
| [74] | Paß et al,<br>2020     | <b>Mitopark</b> | Mouse | C57Bl/6 | DAT                                                                                            | MF | 1-4, 6                | Olfaction,<br>— 1-3,<br>↓ 4, 6mo                                                                     | Buried Pellet Test,<br>Odour Discrimination                                                  | Cell Count,<br>↓ 4-6mo       |
| [75] | Langley et al,<br>2018 | <b>Mitopark</b> | Mouse | C57Bl/6 | DAT                                                                                            | MF | 2                     | — Olfaction                                                                                          | Social Odour Discrimination                                                                  | ↓ Motor                      |
| [76] | Baumann et<br>al, 2016 | <b>VMAT2 KO</b> | Mouse | C47Bl/6 | NS                                                                                             | M  | 12                    | ↓ Depression                                                                                         | Saccharin Preference Test,<br>Forced Swim Test                                               | NA                           |
| [77] | Cui et al,<br>2021     | <b>VMAT2 KO</b> | Mouse | NS      | Dual<br>promoters<br>( <i>Phox2a</i> , <i>Phox2b</i> , <i>Hand2</i> or <i>Gata3</i> from mice) | MF | 12, 18                | ↓ Cognition                                                                                          | Morris Water Maze                                                                            | ↓ Motor                      |
| [78] | Taylor et al,<br>2009  | <b>VMAT2 KO</b> | Mouse | C57Bl/6 | NS                                                                                             | MF | 2, 4, 5, 6,<br>12, 18 | Olfaction,<br>— 2-4mo<br>↓ 5-12mo                                                                    | Social and Non-Social<br>Olfactory Discrimination<br>Test                                    | Motor,<br>— 2, 18mo          |



|      |                               |                                       |       |             |                                     |    |                  |                                                                                                                                   |                                                                                                                       |                                      |
|------|-------------------------------|---------------------------------------|-------|-------------|-------------------------------------|----|------------------|-----------------------------------------------------------------------------------------------------------------------------------|-----------------------------------------------------------------------------------------------------------------------|--------------------------------------|
|      |                               |                                       |       |             |                                     |    |                  | Anxiety,<br>↓ 2mo<br>— 18mo<br><br>Depression,<br>— 2, 18mo<br><br>Circadian,<br>↑ 2mo<br>— 18mo<br><br>GI function,<br>↓ 2, 18mo | Elevated Plus Maze<br><br>Forced Swim Test,<br>Tail Suspension Test<br><br>Sleep Latency Test<br><br>Gastric Emptying |                                      |
| [79] | Rabl et al, 2017              | <b>Ha-syn OE (Thy1-asyn) hemi</b>     | Mouse | NA          | C57Bl/6xD BA                        |    | 1-8              | Cognition,<br>— 2-3, 6mo<br>↓ 8mo                                                                                                 | Fear Conditioning                                                                                                     | Motor,<br>— 1mo<br>↑ 2-3, 6mo        |
| [80] | Gabreilyan et al, 2021        | <b>Ha-syn OE (Thy1-asyn) hemi</b>     | Mouse | NA          | C57Bl/6xD BA2                       | MF | 5-6              | Anxiety,<br>↓ 6mo<br><br>Olfaction,<br>↓ 6mo                                                                                      | Marble Burying Test<br><br>Buried Pellet Test                                                                         | Motor,<br>↓ 5mo                      |
| [81] | Goldberg et al, 2015          | <b>Ha-syn OE (Thy1-asyn) hemi</b>     | Mouse | NA          | C57Bl/6                             | NS | 13               | ↓ Cognition                                                                                                                       | Novel Object Recognition, Object Place Recognition                                                                    | ↓ Motor                              |
| [82] | Lim et al, 2018               | <b>LRRK2 G2019S</b><br>Human gene     | Mouse | B6;C3H      | PDGFB                               | MF | 2-4, 9-11, 14-19 | Anxiety,<br>— 2-4mo,<br>↓ 9-11, 14-19mo<br><br>↓ Depression                                                                       | Light Dark Box,<br>Elevated Plus Maze<br><br>Sucrose Preference Test,<br>Forced Swim Test,<br>Tail Suspension Test    | Motor,<br>— 2-4, 9-11mo<br>↓ 14-19mo |
| [83] | Matikainen-Ankney et al, 2018 | <b>LRRK2 G2019S</b><br>Mouse gene     | Mouse | C57BL/6NTac | Endogenous gene regulatory elements | M  | 2                | — Anxiety<br><br>— Depression                                                                                                     | Elevated Plus Maze<br><br>Sucrose Preference Test                                                                     | — Motor                              |
| [84] | Volta et al, 2015             | <b>LRRK2 G2019S</b><br>BAC human gene | Mouse | C57Bl/6     | Human regulator                     | M  | 3, 6, 12         | Cognition,<br>— 3mo,<br>↓ 12mo                                                                                                    | Novel Object Location, Novel Object Recognition                                                                       | Motor,<br>— 6, 12mo                  |
| [85] | Crown et al,                  | <b>LRRK2</b>                          | Mouse | C57BL/6NTac | Endogenous                          | M  | 8-10             | ↓ Circadian                                                                                                                       | Sleep Recording                                                                                                       | — Motor                              |

|      |                            |                                                                                            |       |                    |                                  |    |                   |                                                 |                                                                                                                                        |                                                              |
|------|----------------------------|--------------------------------------------------------------------------------------------|-------|--------------------|----------------------------------|----|-------------------|-------------------------------------------------|----------------------------------------------------------------------------------------------------------------------------------------|--------------------------------------------------------------|
|      | 2020                       | <b>G2019S</b><br>Mouse gene                                                                |       | c                  | s gene<br>regulatory<br>elements |    |                   |                                                 |                                                                                                                                        |                                                              |
| [86] | Adeosun et al,<br>2017     | <b>LRRK2</b><br><b>G2019S</b>                                                              | Mouse | C57Bl/6            | NS                               | M  | 8-9               | ↓ Cognition                                     | Radial Arm Water Maze,<br>Spatial Recognition,<br>Spontaneous Alternation                                                              | — Motor                                                      |
| [4]  | Valek et al,<br>2021       | <b>PINK1 KO</b><br>(Study tested<br>A53T*PINK1<br>KO but not<br>PINK1 KO for<br>olfaction) | Mouse | 129/SvEv;<br>FVB/N | NA                               | NS | 9                 | NA                                              | NA                                                                                                                                     | — Motor                                                      |
| [87] | Glasl et al,<br>2012       | <b>PINK1 KO</b>                                                                            | Mouse | C57Bl/6            | NA                               | MF | 3-9, 24-<br>27    | Cognition,<br>— 4mo<br><br>Olfaction,<br>↓ 27mo | Novel Object Recognition<br><br>Olfactory Discrimination<br>Test with Reward<br>Associations                                           | Motor,<br>— 3-4, 24-<br>26mo<br><br>Cell Count,<br>— 6, 19mo |
| [88] | Maynard et al,<br>2020     | <b>PINK1 KO</b>                                                                            | Mouse | C57Bl/6            | NA                               | M  | 9-11              | ↓ Cognition<br><br>— Anxiety                    | Spontaneous Alternation,<br>Fear conditioning<br><br>Marble Burying                                                                    | — Motor                                                      |
| [89] | Agnihotri et al,<br>2019   | <b>PINK1 KO</b>                                                                            | Mouse | C57Bl/6            | NA                               | MF | 3                 | — Depression<br><br>— Anxiety                   | Tail Suspension Test,<br>Forced Swim Test,<br>Sucrose Preference Test<br><br>Novelty Suppressed Feeding<br>Test,<br>Elevated Plus Maze | — Motor                                                      |
| [90] | Ferris et al,<br>2018      | <b>PINK1 KO</b>                                                                            | Rat   | Long Evans         | NA                               | M  | 2                 | — Cognition                                     | Novel Object Recognition,<br>Barnes Maze                                                                                               | ↓ Motor                                                      |
| [91] | Hoffmeister<br>et al, 2021 | <b>PINK1 KO</b>                                                                            | Rat   | Long Evans         | NA                               | M  | 4, 8, 12          | ↓ Anxiety                                       | Elevated Plus Maze                                                                                                                     | NA                                                           |
| [92] | Marquis et al,<br>2020     | <b>PINK1 KO</b>                                                                            | Rat   | Long Evans         | NA                               | F  | 2, 4, 6, 8        | ↓ Depression<br><br>↓ Anxiety                   | Sucrose Preference Test<br><br>Elevated Plus Maze,<br>Light/Dark Box                                                                   | ↓ Motor                                                      |
| [93] | Billia et al,<br>2011      | <b>PINK1 KO</b>                                                                            | Mice  | NA                 | NA                               | M  | 2, 6              | ↓ Cardio                                        | ECG Recordings                                                                                                                         | NA                                                           |
| [19] | Peters et al,<br>2020      | <b>Tau KO</b>                                                                              | Mouse | C57Bl/6            | NA                               | MF | 3-4, 6-7,<br>9-10 | — Circadian                                     | EMG/EEG recordings                                                                                                                     | NA                                                           |

|       |                          |                |       |                                                                       |    |    |                    |                                                                                    |                                                                                                        |                                                                     |
|-------|--------------------------|----------------|-------|-----------------------------------------------------------------------|----|----|--------------------|------------------------------------------------------------------------------------|--------------------------------------------------------------------------------------------------------|---------------------------------------------------------------------|
| [94]  | Beauchamp et al, 2018    | <b>Tau KO</b>  | Mouse | Sv129B/6                                                              | NA | MF | 7, 12, 15          | Olfaction,<br>↓ 7, 12mo<br>— 15mo                                                  | Non-Social Olfactory<br>Discrimination Test                                                            | Motor,<br>— 7, 12mo<br>↓ 15mo                                       |
| [95]  | Li et al, 2014           | <b>Tau KO</b>  | Mouse | C57Bl/6                                                               | NA | MF | 22-24              | — Cognition                                                                        | Spontaneous Alternation,<br>Fear Conditioning                                                          | — Motor                                                             |
| [96]  | Lei et al, 2012          | <b>Tau KO</b>  | Mouse | NS                                                                    | NA | NS | 6, 12, 24          | Cognition,<br>— 6,12mo                                                             | Spontaneous Alternation                                                                                | Motor,<br>— 6mo,<br>↓ 12-24mo<br><br>Cell Count,<br>— 6mo<br>↓ 12mo |
| [97]  | Lei et al, 2014          | <b>Tau KO</b>  | Mouse | Compared<br>two<br>background<br>strains:<br>Bl6/129sv<br>and C57Bl/6 | NA | MF | 12                 | Cognition,<br>↓ for<br>Bl6/129sv,<br>— for<br>C57Bl/6                              | Spatial Recognition                                                                                    | ↓ Motor<br>Both models<br><br>↓ Cell Count<br>Both models           |
| [98]  | Morris et al,<br>2013    | <b>Tau KO</b>  | Mouse | C57Bl/6                                                               | NA | MF | 12-15,<br>21-22    | — Cognition                                                                        | Novel Object Recognition,<br>Morris Water Maze                                                         | Motor,<br>↓ 12-15mo<br>— 21-22mo                                    |
| [22]  | Singh et al,<br>2019     | <b>Tau KO</b>  | Mouse | C57Bl/6                                                               | NA | M  | 6, 12              | — Cognition                                                                        | Fear Conditioning,<br>Barnes Maze                                                                      | — Motor                                                             |
| [99]  | Dongworth et<br>al, 2014 | <b>DJ-1 KO</b> | Mouse | C57Bl/6                                                               | NA | NS | NS                 | — Cardio                                                                           | ECG Recordings                                                                                         | NA                                                                  |
| [100] | Pham et al,<br>2010      | <b>DJ-1 KO</b> | Mouse | C57Bl/6                                                               | NA | MF | 6-7, 13-<br>14     | Cognition,<br>— 6-7mo<br>↓ 13-14mo                                                 | Novel Object Recognition                                                                               | NA                                                                  |
| [101] | Li et al, 2019           | <b>DJ-1 KO</b> | Mouse | B6;129                                                                | NA | M  | 3-5                | ↓ Anxiety                                                                          | Elevated Plus Maze,<br>Light Dark Box                                                                  | ↓ Motor                                                             |
| [102] | Billia et al,<br>2013    | <b>DJ-1 KO</b> | Mouse | NA                                                                    | NA | MF | 2                  | — Cardio                                                                           | ECG Recordings                                                                                         | NA                                                                  |
| [103] | Kyser et al,<br>2019     | <b>DJ-1 KO</b> | Rat   | Long Evans                                                            | NA | M  | 2, 4, 7,<br>12, 16 | Cognition,<br>— 4mo<br><br>Anxiety,<br>— 4mo<br><br>Depression,<br>↓ 6mo<br>— 15mo | Novel Object Recognition<br><br>Elevated Plus Maze<br><br>Forced Swim Test,<br>Sucrose Preference Test | Motor,<br>— 2mo<br>↓ 4, 7mo                                         |

|       |                          |                                 |       |         |                                                                |    |                                      |                                                                                                                                       |                                                                                                                                                                                                                |                                                               |
|-------|--------------------------|---------------------------------|-------|---------|----------------------------------------------------------------|----|--------------------------------------|---------------------------------------------------------------------------------------------------------------------------------------|----------------------------------------------------------------------------------------------------------------------------------------------------------------------------------------------------------------|---------------------------------------------------------------|
|       |                          |                                 |       |         |                                                                |    |                                      | Olfaction,<br>— 16mo                                                                                                                  | Buried Pellet Test                                                                                                                                                                                             |                                                               |
| [104] | Liu et al, 2018          | <b>A53T Hemi</b>                | Mouse | B6/C3H  | PrnP                                                           | NS | 3, 6, 9,<br>12                       | Cognition,<br>↑ 3, 9mo                                                                                                                | Morris Water Maze                                                                                                                                                                                              | Motor,<br>— 3, 6, 9mo<br>↑12mo                                |
| [105] | Uemura et al,<br>2021    | <b>A53T Het<br/>BAC</b>         | Mouse | C57Bl/6 | Endogenou<br>s gene<br>regulatory<br>elements                  | M  | 4, 9-12                              | Olfaction,<br>— 4mo<br><br>Anxiety,<br>— 9mo<br><br>Depression,<br>— 9, 11mo<br><br>Cognition,<br>— 9, 10<br><br>Circadian,<br>— 12mo | Social and Novel Odour<br>Discrimination<br><br>Light Dark Box<br><br>Forced Swim Test,<br>Tail Suspension Test<br><br>Spontaneous Alternation,<br>Barnes Maze,<br>Fear Conditioning<br><br>Home Cage Activity | Motor,<br>— 9mo                                               |
| [106] | Hamill et al,<br>2012    | <b>A53T Hemi</b>                | Mouse | B6/C3H  | PrnP                                                           | MF | 1-16                                 | Urinary,<br>↓ 4-16mo                                                                                                                  | Cystometric Recordings                                                                                                                                                                                         | Motor,<br>↓ 11-16mo                                           |
| [107] | La Vitola et al,<br>2021 | <b>A53T Hemi</b>                | Mouse | C57Bl/6 | PrnP                                                           | NS | 8                                    | — Cognition                                                                                                                           | Novel Object Recognition,<br>Spontaneous Alternation,<br>Morris Water Maze                                                                                                                                     | ↑ Motor<br><br>↓ Cell Count                                   |
| [108] | Tikhonova et<br>al, 2020 | <b>A53T Hemi</b>                | Mouse | C57Bl/6 | PrnP                                                           | M  | 6                                    | ↓ Cognition                                                                                                                           | Passive Avoidance Test                                                                                                                                                                                         | ↑ Motor                                                       |
| [109] | Giesert et al,<br>2017   | <b>LRRK2<br/>R1441C</b>         | Mouse | C57BL/6 | NS                                                             | NS | 2, 3, 5,<br>24-26                    | Olfaction,<br>↓ 24-26mo<br><br>Cognition,<br>— 3mo<br><br>Depression,<br>↓ 7-8mo                                                      | Olfactory Discrimination<br>Test with Reward<br>Association<br><br>Novel Object Recognition<br><br>Forced Swim Test,<br>Tail Suspension Test                                                                   | Motor,<br>— 3mo<br>↓ 24-26mo<br><br>Cell Count,<br>— 5, 28 mo |
| [110] | Bichler et al,<br>2013   | <b>LRRK2<br/>R1441G<br/>BAC</b> | Mouse | FVB/N   | human LRR<br>K2 promote<br>r/enhancer<br>regions on<br>the BAC | NS | 4, 6, 9,<br>12, 14,<br>16, 18-<br>21 | Anxiety,<br>— 6, 14,<br>19mo<br><br>Depression,                                                                                       | Elevated Plus Maze<br><br>Tail Suspension Test,                                                                                                                                                                | Motor,<br>— 2-12mo<br>↓16-21mo                                |

|       |                                  |                                 |       |         |                                                                             |    |     |                                                                                                         |                                                                                                                                                                   |         |
|-------|----------------------------------|---------------------------------|-------|---------|-----------------------------------------------------------------------------|----|-----|---------------------------------------------------------------------------------------------------------|-------------------------------------------------------------------------------------------------------------------------------------------------------------------|---------|
|       |                                  |                                 |       |         | transgene                                                                   |    |     | — 6-19mo<br><br>Cognition,<br>— 21mo<br><br>GI function,<br>↓ 6, 9, 21mo<br><br>Olfaction,<br>— 6, 14mo | Forced Swim Test<br><br>Passive Avoidance Test<br><br>Faecal Pellet Output<br><br>Block Test,<br>Buried Pellet Test                                               |         |
| [111] | Mikhail et al<br>2015            | <b>LRRK2<br/>R1441G<br/>BAC</b> | Mouse | FVB     | NS                                                                          | NS | 6-9 | — Cognition                                                                                             | Fear Conditioning                                                                                                                                                 | — Motor |
| [112] | Dranka et al,<br>2014            | <b>LRRK2<br/>R1441G<br/>BAC</b> | Mouse | FVB/N   | human LRR<br>K2 promote<br>r/enhancer<br>regions on<br>the BAC<br>transgene | M  | 15  | ↓ Olfaction                                                                                             | Buried Pellet Test                                                                                                                                                | ↓ Motor |
| [113] | Lopatina et al,<br>2014          | <b>CD157 KO</b>                 | Mouse | C57Bl/6 | NA                                                                          | M  | 2   | ↓Anxiety<br><br>↓Depression<br><br>↑ Cognition<br><br>— Circadian                                       | Centre of Open Field,<br>Light Dark Box,<br>Elevated Plus Maze<br><br>Tail Suspension Test<br>Forced swim Test<br><br>Fear Conditioning<br><br>Home Cage Activity | — Motor |
| [114] | Mizuno et al,<br>2015            | <b>CD157 KO</b>                 | Mouse | C57Bl/6 | NA                                                                          | M  | NS  | ↓ Anxiety                                                                                               | Anxiety and Social<br>Preference Test with Social<br>Target                                                                                                       | NA      |
| [115] | Kasai et al,<br>2017             | <b>CD157 KO</b>                 | Mouse | C57Bl/6 | NA                                                                          | M  | 2   | ↓ Anxiety<br><br>↓ Depression                                                                           | Centre of Open Field<br><br>Forced Swim Test                                                                                                                      | ↓ Motor |
| [116] | Higashida et<br>al, 2017         | <b>CD157 KO</b>                 | Mouse | C57Bl/6 | NA                                                                          | MF | 1   | ↓ Anxiety                                                                                               | Light Dark Box                                                                                                                                                    | NA      |
| [117] | Maekawa et<br>al, 2019           | <b>LRRK2 KO</b>                 | Mouse | C57Bl/6 | NA                                                                          | M  | 1-3 | — GI<br>Function                                                                                        | Bead Expulsion Test,<br>Intestinal Transit Assay                                                                                                                  | NA      |
| [118] | Beccano-<br>Kelly et al,<br>2015 | <b>LRRK2 KO</b>                 | Mouse | NSA     | NA                                                                          | M  | 3-6 | — Cognition                                                                                             | Novel Object Recognition                                                                                                                                          | — Motor |

|       |                     |                                     |       |              |          |    |                   |                                                                        |                                                                                                                                                                |                                              |
|-------|---------------------|-------------------------------------|-------|--------------|----------|----|-------------------|------------------------------------------------------------------------|----------------------------------------------------------------------------------------------------------------------------------------------------------------|----------------------------------------------|
| [119] | Maset et al, 2021   | <b>LRRK2 KO</b>                     | Mouse | C57Bl/6      | NA       | MF | 1                 | ↓ Olfaction                                                            | Habituation/Dishabituation Test                                                                                                                                | NA                                           |
| [84]  | Volta et al, 2015   | <b>LRRK2 KO</b>                     | Mouse | C57Bl/6      | NA       | M  | 12                | — Cognition                                                            | Novel Object Location, Novel Object Recognition                                                                                                                | — Motor                                      |
| [109] | Giesert et al, 2017 | <b>LRRK2 KO</b>                     | Mouse | NS           | Human U6 | NS | 3-4, 11-13, 24    | Olfaction, — 24mo<br><br>Cognition, — 4mo<br><br>Depression, ↓ 11-13mo | Olfactory Discrimination Test with Reward Association<br><br>Novel Object Recognition<br><br>Forced Swim Test, Tail Suspension Test                            | Motor, — 3, 24mo                             |
| [120] | Navarro et al, 2008 | <b>Parkin KO</b><br>Exon 2 deletion | Mouse | C57Bl/6      | NA       | M  | 6-8, 15-17        | ↓ Cognition                                                            | Novel Object Recognition                                                                                                                                       | NA                                           |
| [121] | Zhu et al, 2007     | <b>Parkin KO</b><br>Exon 3 deletion | Mouse | C57Bl/6      | NA       | NS | 6, 12, 15, 18, 21 | Cognition, ↓ No age<br><br>Anxiety, ↓ 6-15, 21mo                       | Morris Water Maze<br><br>Light Dark Box                                                                                                                        | — Motor                                      |
| [122] | Rial et al, 2014    | <b>Parkin KO</b><br>Exon 3 deletion | Mouse | C57Bl/6      | NA       | M  | 5-6               | — Olfaction<br><br>— Depression<br><br>— Anxiety<br>↓ Cognition        | Olfactory Bedding Discrimination Test<br><br>Forced Swim Test, Tail Suspension Test<br><br>Elevated Plus Maze<br>Novel Object Recognition, Spatial Recognition | ↑ Motor                                      |
| [123] | Itier et al, 2003   | <b>Parkin KO</b><br>Exon 3 deletion | Mouse | 129SV/C57BL6 | NA       | MF | 2-24              | Cognition, ↓ 4mo                                                       | Spontaneous Alternation                                                                                                                                        | Motor, ↓ 5-6, 12mo<br><br>Cell Count, — 15mo |
| [124] | Perez et al, 2005   | <b>Parkin KO</b><br>Exon 2 deletion | Mouse | B6;129S4     | NA       | M  | 3, 6, 12, 18-22   | Depression, — 12<br>↓ 20mo<br><br>Anxiety, —12, 20m                    | Forced Swim Test, Tail Suspension Test<br><br>Light Dark Box, Elevated Plus Maze                                                                               | ↓ Motor                                      |

|       |                          |                                     |       |             |    |    |                  |                                                    |                                                                                                                                                                                                            |                                                   |
|-------|--------------------------|-------------------------------------|-------|-------------|----|----|------------------|----------------------------------------------------|------------------------------------------------------------------------------------------------------------------------------------------------------------------------------------------------------------|---------------------------------------------------|
|       |                          |                                     |       |             |    |    |                  | Cognition,<br>↑ 12mo<br>—21mo                      | Novel Object Recognition,<br>Spontaneous Alternation,<br>Straight-alley-swim escape,<br>Black-White-Discrimination<br>Swim task,<br>Lashley III Swim Maze,<br>Morris Water Maze,<br>Passive Avoidance Test |                                                   |
| [125] | Kubli, et al<br>2013     | <b>Parkin KO</b>                    | Mouse | 129S4/SvJae | NA | M  | 3                | —Cardio                                            | ECG Recordings                                                                                                                                                                                             | NA                                                |
| [126] | Hollville et al,<br>2020 | <b>Parkin KO</b><br>Exon 3 deletion | Mouse | C57Bl/6     | NA | MF | 3-7, 17-<br>19mo | Olfaction,<br>— 6-7mo<br><br>Cognition,<br>— 5-7mo | Buried Pellet Test<br><br>Morris Water Maze                                                                                                                                                                | Motor,<br>— 3-5mo<br><br>Cell Count,<br>— 17-19mo |

Table 1. Summary of all animal model characteristics, phenotypic tests performed and the outcomes. ↓ represents a significant impairment, ↑ represents an improvement and — represents no change between wildtype and transgenic animals. M – male, F – female, MF – male and female, NS – not specified. BAC – Bacterial Artificial Chromosomes, PAC – P1 derived artificial chromosome.

## Supplementary Table S2

Study characteristics, phenotypic outcomes, and tests performed in genetic PD models used in 2 studies or fewer.

| Ref no. | Author, Year              | Model        | Rodent | Target                                                                 | Background Strain | Sex and Age (mo) | Outcome                                  | Test Performed                                                             | Motor or Cell Count?        |
|---------|---------------------------|--------------|--------|------------------------------------------------------------------------|-------------------|------------------|------------------------------------------|----------------------------------------------------------------------------|-----------------------------|
| [127]   | Pavia-Collado et al, 2021 | A30P/A53T    | Mouse  | Double transgenic model of alpha-synuclein mutations under TH promotor | C57BL/6J          | M, 5             | ↓ Anxiety<br>— Depression<br>↓ Cognition | Light Dark Box<br><br>Tail Suspension Test<br><br>Novel Object Recognition | ↓ Motor<br><br>— Cell Count |
| [128]   | Lelan et al, 2011         | A30P/A53T    | Rat    | Double transgenic model of A30P and A53T under TH promotor             | Sprague Dawley    | F, 6, 9, 14, 18  | Olfaction,<br>↓ 6, 9, 14mo               | Olfactory Discrimination Test                                              | Motor,<br>— 14, 18mo        |
| [4]     | Valek et al, 2021         | PINK KO/A53T | Mouse  | Double transgenic model containing PINK KO and A53T                    | 129/SvEv; FVB/N   | NS, 13-16        | Olfaction,<br>— 16mo                     | NOR using odours                                                           | Motor,<br>— 13-16mo         |

|       |                               |                                                |       | mutation                                                                                                                                                                       |         |                                         |                                                                    |                                                  |                                                                                                                                |
|-------|-------------------------------|------------------------------------------------|-------|--------------------------------------------------------------------------------------------------------------------------------------------------------------------------------|---------|-----------------------------------------|--------------------------------------------------------------------|--------------------------------------------------|--------------------------------------------------------------------------------------------------------------------------------|
| [15]  | Do et al, 2021                | GBA+/-/A53T and GBA+/-                         | Mouse | Double transgenic of GBA+/- and A53T, and model of single GBA+/- mutation                                                                                                      | C57BL/6 | MF, 8, 10, 12, 14, then monthly to 23mo | – Cognition<br>Both models<br><br>Olfaction, ↓ 20mo<br>Both models | NOR<br><br>Buried Pellet Test                    | – Motor<br>Both models                                                                                                         |
| [22]  | Singh et al, 2019             | Tau KO/A53T                                    | Mouse | Double transgenic with mutant A53T and lacking endogenous Tau                                                                                                                  | C57BL/6 | M, 3, 6, 12                             | – Cognition                                                        | Fear Conditioning, Y Maze                        | Motor, ↑ 6, 12mo                                                                                                               |
| [19]  | Peters et al, 2020            | Tau KO/A53T                                    | Mouse | Double transgenic with mutant A53T and lacking endogenous Tau                                                                                                                  | C57BL/6 | MF, 3-4, 6-7, 9-10                      | ↓ Circadian                                                        | EMG/EEG recordings                               | NA                                                                                                                             |
| [129] | Ikuno et al, 2019             | a-syn/GBA+/-                                   | Mouse | Double transgenic with BAC a-syn OE and heterozygous GBA mutation                                                                                                              | B6/J    | M, 15-18                                | Anxiety, ↑15mo<br><br>Cognition, – 15mo                            | Centre of Open Field<br><br>Barnes Maze          | Motor, ↑ 15mo<br><br>Cell count, ↓ 16-18mo                                                                                     |
| [130] | Hosford et al, 2020           | αβγ-syn triple KO                              | Mouse | Triple transgenic model of alpha, beta, and gamma synuclein knock out                                                                                                          | C57Bl/6 | M, 3-4, 18-20                           | Cardio, 3-4mo<br>↓ 18-20mo                                         | Non-invasive tail cuff plethysmography           | NA                                                                                                                             |
| [131] | Tian et al, 2021              | a-syn N103                                     | Mouse | New transgenic model of PD overexpressing a-syn 1-103 fragments with Thy-1 promotor                                                                                            | C57BL/6 | MF, 3, 9, 16                            | Anxiety, – 3mo<br>↓ 9-16mo<br><br>↓ GI Function                    | Centre of Open Field<br><br>Faecal Pellet Output | Motor, – 3mo<br>↓ 9, 16mo<br><br>Cell Count, – 3mo<br>↓ 9, 16mo                                                                |
| [132] | Martinez ernandez et al, 2021 | Ha-syn <sup>119</sup> and ha-syn <sup>TP</sup> | Mouse | C-terminal truncations of haSyn (ha-syn <sup>119</sup> ), and a-syn gene variant with three alanine to proline substitutions at residues 30, 56 and 76 (ha-syn <sup>TP</sup> ) | C57BL/6 | M, 12, 18                               | Olfaction, ↓ 18mo<br>Both models                                   | Buried Pellet Test                               | Motor, ↓ 12mo<br>Ha-syn <sup>119</sup> – 12mo<br>Ha-syn <sup>TP</sup> ↓ 18mo<br>Both Models<br><br>– Cell Count<br>Both models |
| [133] | Escobar et                    | SNCA <sup>S129A</sup> PAC                      | Mouse | 2 models of S129                                                                                                                                                               | FVB/N x | MF,                                     | ↓ GI Function                                                      | Bead Expulsion Test                              | NA                                                                                                                             |



|       |                              |                                                    |       |                                                                                                                                             |                      |                         |                                                                              |                                                                                                              |                                                                  |
|-------|------------------------------|----------------------------------------------------|-------|---------------------------------------------------------------------------------------------------------------------------------------------|----------------------|-------------------------|------------------------------------------------------------------------------|--------------------------------------------------------------------------------------------------------------|------------------------------------------------------------------|
|       | al, 2014                     | and<br><i>SNCA</i> <sup>S129D</sup> PAC            |       | phosphorylation<br>mutation in alpha-<br>synuclein                                                                                          | 129S6                | 6                       | Both models                                                                  |                                                                                                              |                                                                  |
| [120] | Navarro<br>et al, 2008       | Park-/Tau <sup>VLW</sup><br>and Tau <sup>VLW</sup> | Mouse | Double transgenic<br>model of Parkin<br>deficient and a<br>Tau <sup>VLW</sup> model and a<br>single model of<br>Tau <sup>VLW</sup> mutation | C57Bl/6              | M,<br>6-8, 15-17        | Cognition,<br>↓ 6-8mo<br>Both models<br>↓ 15-17mo<br>Tau <sup>VLW</sup> only | Novel Object<br>Recognition                                                                                  | NA                                                               |
| [111] | Mikhail et<br>al, 2015       | LRRK2<br>R1441G/Tau<br>P301S and<br>TauP301S       | Mouse | Double transgenic<br>model of LRRK2<br>R1441G and<br>TauP301S mutation<br>and a single model of<br>TauP301S mutation                        | Unspecified          | NS,<br>6-9              | — Cognition<br>Both models                                                   | Fear Conditioning                                                                                            | — Motor<br>Both models                                           |
| [134] | Craven et<br>al, 2018        | TauP301L                                           | Mouse | Tau mutation model                                                                                                                          | C57Bl/6              | MF,<br>5.5-7            | ↓ Cognition<br><br>↓ Circadian<br>Rhythm                                     | Morris Water Maze,<br>Fear Conditioning<br>and Extinction<br><br>Activity Onset<br>Running Wheel<br>Activity | ↑ Motor                                                          |
| [98]  | Morris et<br>al, 2013        | Tau+/-                                             | Mouse | Heterozygous Tau<br>KO model                                                                                                                | C57Bl/6              | MF,<br>12-15, 21-<br>22 | Cognition,<br>— 21-22mo                                                      | Novel Object<br>Recognition,<br>Morris Water Maze                                                            | ↓ Motor                                                          |
| [135] | Lambourn<br>e et al,<br>2007 | TauV337M<br>hemi                                   | Mouse | Hemizygous<br>mutation model of<br>TauV337M under<br>Thy1 promotor                                                                          | C57BL/6J x<br>CBA/Ca | M,<br>6, 10, 24-<br>26  | Cognition,<br>— 10mo<br>↓ 24mo                                               | 5 Choice Serial<br>Reaction Time Test                                                                        | Motor,<br>— 6, 24mo                                              |
| [136] | Lambourn<br>e et al,<br>2005 | TauV337M<br>hemi                                   | Mouse | Hemizygous<br>mutation model of<br>TauV337M under<br>Thy1 promotor                                                                          | C57Bl/6 x<br>CBA/Ca  | NS,<br>6, 12            | Olfaction,<br>— 6mo<br>— 12mo<br><br>Cognition,<br>— 6mo<br>↓ 12mo           | Food Preference Test<br><br>STFP Olfactory<br>Memory Paradigm                                                | Motor,<br>— 12mo                                                 |
| [137] | Anvret et<br>al, 2012        | Adh1-/- and<br>Adh1/4-/-                           | Mouse | Double KO of the<br>ADH gene, relevant<br>to the DA system                                                                                  | C57Bl/6              | MF,<br>7, 15            | — Olfaction<br>Both models                                                   | Olfactory Hole Poke<br>Test                                                                                  | Motor,<br>↑ 7mo<br>Adh1 KO and<br>Adh1/4 KO<br>↑ 15mo<br>Adh1 KO |

|       |                                  |                          |       |                                                                                                                            |             |                   |                                                                                                                                                                                      |                                                                                                                                                                                                                  |                        |
|-------|----------------------------------|--------------------------|-------|----------------------------------------------------------------------------------------------------------------------------|-------------|-------------------|--------------------------------------------------------------------------------------------------------------------------------------------------------------------------------------|------------------------------------------------------------------------------------------------------------------------------------------------------------------------------------------------------------------|------------------------|
|       |                                  |                          |       |                                                                                                                            |             |                   |                                                                                                                                                                                      |                                                                                                                                                                                                                  | – 15mo<br>Adh1/4 KO    |
| [138] | Belin et al,<br>2011             | Adh4-/-                  | Mouse | KO of the Class IV<br>ADH gene, relevant<br>to the DA system                                                               | C57Bl/6     | M,<br>12-17       | ↓ Olfaction                                                                                                                                                                          | Olfactory Hole Poke<br>Test                                                                                                                                                                                      | – Motor                |
| [118] | Beccano-<br>Kelly et al,<br>2015 | LRRK2 OE                 | Mouse | Overexpression of<br>LRRK2                                                                                                 | Unspecified | M,<br>3-6         | – Cognition                                                                                                                                                                          | Novel Object<br>Recognition                                                                                                                                                                                      | ↓ Motor                |
| [84]  | Volta et al,<br>2015             | LRRK2 OE                 | Mouse | Overexpression of<br>LRRK2                                                                                                 | C57Bl/6     | M,<br>12          | ↓ Cognition                                                                                                                                                                          | Novel Object<br>Recognition                                                                                                                                                                                      | ↓ Motor                |
| [139] | Veenit et<br>al, 2021            | GPR37 KO                 | Mouse | KO of the G-protein-<br>coupled receptor,<br>implicated in DA<br>system                                                    | C7Bl/6      | MF,<br>3-4        | ↓ Anxiety<br><br>↓ Depression<br><br>↑ Cognition                                                                                                                                     | Elevated Plus Maze,<br>Light Dark Box<br><br>Forced Swim Test<br><br>Passive Avoidance<br>Test                                                                                                                   | NA                     |
| [140] | Mandillo<br>et al, 2013          | GPR37 KO                 | Mouse | KO of the G-protein-<br>coupled receptor,<br>implicated in DA<br>system                                                    |             | MF,<br>4-6, 16-18 | Olfaction,<br>– 4-6mo<br>↓ 16-18mo<br><br>GI function,<br>↓ 4-6mo<br>– 16-18mo<br><br>– Cognition<br><br>Anxiety,<br>– 4-6mo<br>↓ 16-18mo<br><br>Depression,<br>– 4-6mo<br>↓ 16-18mo | Buried Pellet Test,<br>Block Test,<br>Odour habituation<br>Test<br><br>Faecal Output Test<br><br>Fear conditioning<br><br>Elevated Plus Maze,<br>Centre of Open Field,<br>Light Dark Box<br><br>Forced Swim Test | NA                     |
| [141] | Morgan et<br>al, 2015            | DAT:TH KO<br>and DAT-DTR | Mouse | Inactivation of Th<br>gene in DAT neurons<br>(DAT:TH KO), and<br>targeted expression<br>of human DT-<br>receptor (DAT-DTR) | C57Bl/6     | MF,<br>3-5        | ↓ Cognition<br>Both models                                                                                                                                                           | Turn and Cued<br>Discrimination<br>Learning,<br>Morris Water Maze,<br>Novel Object<br>Recognition                                                                                                                | ↓ Motor<br>Both models |

|       |                        |                |       |                                                                                                                |         |                      |                                                                            |                                                                                                                                                                                         |                                                                   |
|-------|------------------------|----------------|-------|----------------------------------------------------------------------------------------------------------------|---------|----------------------|----------------------------------------------------------------------------|-----------------------------------------------------------------------------------------------------------------------------------------------------------------------------------------|-------------------------------------------------------------------|
| [142] | Buhusi et al, 2016     | GDNF deficient | Mouse | Heterozygous model of GDNF deficiency; involved in DA regulation                                               | C57Bl/6 | M, 6-8               | — Cognition                                                                | Temporal Discounting Paradigm                                                                                                                                                           | NA                                                                |
| [143] | Prediger et al, 2011   | Mdk-/-         | Mouse | Deletion of heparin-binding growth factor midkine, implicated in nigrostriatal development                     | C57Bl/6 | M, 3-4               | ↓ Olfaction<br><br>↓ Cognition                                             | Olfactory Discrimination Task<br><br>Short Term Recognition Memory Task                                                                                                                 | — Motor<br><br>↓ Cell Count                                       |
| [144] | Jiang et al, 2020      | VMAT2 Het      | Mouse | Mice from crossing CreERT2 and floxed Vmat2 gene. Selective inactivation of one allele of VMAT2 in DA neurons. | C57Bl/6 | M, 18                | ↓ Olfaction<br><br>— Circadian<br>— Anxiety<br>— Cognition<br>— Depression | Social and Non-Social Olfactory Discrimination Test<br><br>E-motion Test<br><br>Elevated Plus Maze<br><br>Novel Object Recognition<br><br>Sucrose Preference Test, Tail Suspension Test | ↓ Motor                                                           |
| [145] | Sonnier et al, 2007    | En1+/-         | Mouse | Heterozygous model lacking one En1 (engrailed1) allele, involved in DA neuron survival                         | Swiss   | M, 1-11              | Depression, ↓ 6, 8mo                                                       | Forced Swim Test, Saccharin Preference Test                                                                                                                                             | Motor, ↓ 5mo<br>— 6mo<br><br>Cell Count, — 1mo<br>↓ 2, 3, 5, 11mo |
| [146] | Wu et al, 2020         | B4galnt1 KO    | Mouse | Disruption of <i>B4galnt1</i> gene leading to partial deficiency of GM1 family of gangliosides                 | C57Bl/6 | MF, 8-9              | ↓ Cognition<br><br>↓ GI Function                                           | Alternation Task (T maze)<br><br>Faecal Pellet Output                                                                                                                                   | ↓ Motor<br><br>↓ Cell Count                                       |
| [147] | Gil-Tommee et al, 2019 | B4galnt1 KO    | Mouse | Disruption of <i>B4galnt1</i> gene leading to partial deficiency of GM1 family of                              | NA      | MF, 9, 12, 16, 19-20 | Urinary, —9mo<br>↓ 12-20mo                                                 | Urination Patterns, Bladder Volumes                                                                                                                                                     | — Motor                                                           |

|       |                            |                            |       |                                                                                                                        |         |                    |                                                                      |                                                                                                                                                                                    |                                                                   |
|-------|----------------------------|----------------------------|-------|------------------------------------------------------------------------------------------------------------------------|---------|--------------------|----------------------------------------------------------------------|------------------------------------------------------------------------------------------------------------------------------------------------------------------------------------|-------------------------------------------------------------------|
|       |                            |                            |       | gangliosides                                                                                                           |         |                    |                                                                      |                                                                                                                                                                                    |                                                                   |
| [148] | Parrella et al, 2019       | c-rel-/-                   | Mouse | Model deficient for the NF-κB/c-Rel protein, a transcription factor for mitochondrial antioxidant factors              | C57Bl/6 | M, 2, 5, 9, 15, 20 | ↓ GI Function<br>– Anxiety<br><br>↓ Olfaction<br><br><br>– Cognition | Faecal Pellet Output<br><br>Centre of Open Field Test<br><br>Odour Detection Test,<br>Odour and item discrimination test,<br>Odour preference Test<br><br>Novel Object Recognition | NA                                                                |
| [126] | Hollville et al, 2020      | Cul9/parkin KO and Cul9 KO | Mouse | Double knockout model of Cul9 and Parkin, both E3 ligases involved in mitochondrial function, and single Cul9 KO model | C57Bl/6 | MF, 3-7            | – Olfaction Both models<br><br>– Cognition Both models               | Buried Pellet Test<br><br>Morris Water Maze                                                                                                                                        | – Motor Both models<br><br>– Cell Count Both models               |
| [149] | Ageta-Ishihara et al, 2013 | SEPT4+/-                   | Mouse | Parkin substrate that is a component of Lewy bodies                                                                    | C57Bl/6 | M, 5-9             | ↑ Anxiety<br><br>– Depression<br><br>– Cognition<br><br>– Circadian  | Elevated Plus Maze, Light Dark Box<br><br>Forced Swim Test, Tail Suspension Test<br><br>Fear Conditioning<br><br>Home Cage Monitoring of Locomotion 24hrs                          | – Motor                                                           |
| [150] | Havrda et al, 2013         | Id2 KO                     | Mouse | Transcription factor expressed in developing central nervous system                                                    | C57Bl/6 | MF, 1, 3, 6        | Anxiety,<br>↑ 1, 3mo<br>– 6mo                                        | Centre of Open Field,<br>Elevated Plus Maze                                                                                                                                        | Motor,<br>↑ 1, 3mo<br>– 6mo<br><br>Cell Count,<br>– 1 mo<br>↓ 6mo |

Table 2. Summary of all animal model characteristics, behavioural tests performed and the outcomes. ↓ represents a significant impairment, ↑ represents an improvement and – represents no change between wildtype and transgenic animals. M – male, F – female, MF – male and female, NS – not specified. PAC – P1 derived artificial chromosome.

1. Griffioen, K.J., et al., *Dietary energy intake modifies brainstem autonomic dysfunction caused by mutant alpha-synuclein*. Neurobiol Aging, 2013. **34**(3): p. 928-35.
2. Kuo, Y.M., et al., *Extensive enteric nervous system abnormalities in mice transgenic for artificial chromosomes containing Parkinson disease-associated alpha-synuclein gene mutations precede central nervous system changes*. Hum Mol Genet, 2010. **19**(9): p. 1633-50.
3. Carboni, E., et al., *Deferiprone Rescues Behavioral Deficits Induced by Mild Iron Exposure in a Mouse Model of Alpha-Synuclein Aggregation*. Neuromolecular Med, 2017. **19**(2-3): p. 309-321.
4. Valek, L., et al., *Prodromal sensory neuropathy in Pink1(-/-) SNCA(A53T) double mutant Parkinson mice*. Neuropathol Appl Neurobiol, 2021. **47**(7): p. 1060-1079.
5. Kuo, Y.M., et al., *Translational inhibition of  $\alpha$ -synuclein by Posiphen normalizes distal colon motility in transgenic Parkinson mice*. Am J Neurodegener Dis, 2019. **8**(1): p. 1-15.
6. Seo, J.H., et al., *Environmental Enrichment Attenuates Oxidative Stress and Alters Detoxifying Enzymes in an A53T alpha-Synuclein Transgenic Mouse Model of Parkinson's Disease*. Antioxidants (Basel), 2020. **9**(10).
7. Farrell, K.F., et al., *Non-motor parkinsonian pathology in aging A53T alpha-synuclein mice is associated with progressive synucleinopathy and altered enzymatic function*. J Neurochem, 2014. **128**(4): p. 536-46.
8. Wi, S., et al., *An Enriched Environment Ameliorates Oxidative Stress and Olfactory Dysfunction in Parkinson's Disease with alpha-Synucleinopathy*. Cell Transplant, 2018. **27**(5): p. 831-839.
9. Zhang, S., Q. Xiao, and W. Le, *Olfactory dysfunction and neurotransmitter disturbance in olfactory bulb of transgenic mice expressing human A53T mutant alpha-synuclein*. PLoS One, 2015. **10**(3): p. e0119928.
10. Gerson, J.E., et al., *Tau oligomers mediate alpha-synuclein toxicity and can be targeted by immunotherapy*. Mol Neurodegener, 2018. **13**(1): p. 13.
11. Diwakarla, S., et al., *ATH434 Reverses Colorectal Dysfunction in the A53T Mouse Model of Parkinson's Disease*. J Parkinsons Dis, 2021. **11**(4): p. 1821-1832.
12. Diwakarla, S., et al., *Chronic isolation stress is associated with increased colonic and motor symptoms in the A53T mouse model of Parkinson's disease*. Neurogastroenterol Motil, 2020. **32**(3): p. e13755.
13. Taguchi, T., et al., *alpha-Synuclein BAC transgenic mice exhibit RBD-like behaviour and hyposmia: a prodromal Parkinson's disease model*. Brain, 2020. **143**(1): p. 249-265.

14. Li, H., et al., *DL-3-n-Butylphthalide Alleviates Behavioral and Cognitive Symptoms Via Modulating Mitochondrial Dynamics in the A53T-alpha-Synuclein Mouse Model of Parkinson's Disease*. Front Neurosci, 2021. **15**: p. 647266.
15. Do, J., et al., *Behavioral Phenotyping in a Murine Model of GBA1-Associated Parkinson Disease*. Int J Mol Sci, 2021. **22**(13).
16. Stanojlovic, M., et al., *Pharmacological and chemogenetic orexin/hypocretin intervention ameliorates Hipp-dependent memory impairment in the A53T mice model of Parkinson's disease*. Mol Brain, 2019. **12**(1): p. 87.
17. Graham, D.R. and A. Sidhu, *Mice expressing the A53T mutant form of human alpha-synuclein exhibit hyperactivity and reduced anxiety-like behavior*. J Neurosci Res, 2010. **88**(8): p. 1777-83.
18. Costa, G., et al., *Gender Differences in Neurodegeneration, Neuroinflammation and Na(+)-Ca(2+) Exchangers in the Female A53T Transgenic Mouse Model of Parkinson's Disease*. Front Aging Neurosci, 2020. **12**: p. 118.
19. Peters, S.T., et al., *Ablating Tau Reduces Hyperexcitability and Moderates Electroencephalographic Slowing in Transgenic Mice Expressing A53T Human alpha-Synuclein*. Front Neurol, 2020. **11**: p. 563.
20. Paumier, K.L., et al., *Behavioral characterization of A53T mice reveals early and late stage deficits related to Parkinson's disease*. PLoS One, 2013. **8**(8): p. e70274.
21. Thom, T., et al., *Cellular Prion Protein Mediates alpha-Synuclein Uptake, Localization, and Toxicity In Vitro and In Vivo*. Mov Disord, 2022. **37**(1): p. 39-51.
22. Singh, B., et al., *Tau is required for progressive synaptic and memory deficits in a transgenic mouse model of alpha-synucleinopathy*. Acta Neuropathol, 2019. **138**(4): p. 551-574.
23. Pfeffer, M., et al., *Impaired Photic Entrainment of Spontaneous Locomotor Activity in Mice Overexpressing Human Mutant alpha-Synuclein*. Int J Mol Sci, 2018. **19**(6).
24. Zhang, L.F., et al., *Resveratrol alleviates motor and cognitive deficits and neuropathology in the A53T alpha-synuclein mouse model of Parkinson's disease*. Food Funct, 2018. **9**(12): p. 6414-6426.
25. Rockenstein, E., et al., *Glucocerebrosidase modulates cognitive and motor activities in murine models of Parkinson's disease*. Hum Mol Genet, 2016. **25**(13): p. 2645-2660.
26. West, C.L., et al., *Squalamine Restores the Function of the Enteric Nervous System in Mouse Models of Parkinson's Disease*. J Parkinsons Dis, 2020. **10**(4): p. 1477-1491.
27. Noorian, A.R., et al., *Alpha-synuclein transgenic mice display age-related slowing of gastrointestinal motility associated with transgene expression in the vagal system*. Neurobiol Dis, 2012. **48**(1): p. 9-19.
28. Tikhonova, M.A., et al., *Evaluating the Effects of Grain of Isogenic Wheat Lines Differing in the Content of Anthocyanins in Mouse Models of Neurodegenerative Disorders*. Nutrients, 2020. **12**(12).
29. Wang, W., et al., *Genomic DNA levels of mutant alpha-synuclein correlate with non-motor symptoms in an A53T Parkinson's disease mouse model*. Neurochem Int, 2018. **114**: p. 71-79.
30. Li, Y., et al., *Sirt1/FoxO1-Associated MAO-A Upregulation Promotes Depressive-Like Behavior in Transgenic Mice Expressing Human A53T alpha-Synuclein*. ACS Chem Neurosci, 2020. **11**(22): p. 3838-3848.

31. Rota, L., et al., *Constipation, deficit in colon contractions and alpha-synuclein inclusions within the colon precede motor abnormalities and neurodegeneration in the central nervous system in a mouse model of alpha-synucleinopathy*. Transl Neurodegener, 2019. **8**: p. 5.
32. Kim, S., et al., *Alpha-synuclein interferes with cAMP/PKA-dependent upregulation of dopamine beta-hydroxylase and is associated with abnormal adaptive responses to immobilization stress*. Exp Neurol, 2014. **252**: p. 63-74.
33. Vidal-Martinez, G., et al., *FTY720/Fingolimod Reduces Synucleinopathy and Improves Gut Motility in A53T Mice: CONTRIBUTIONS OF PRO-BRAIN-DERIVED NEUROTROPHIC FACTOR (PRO-BDNF) AND MATURE BDNF*. J Biol Chem, 2016. **291**(39): p. 20811-21.
34. Huang, Y.R., et al., *Naturally occurring autoantibodies against alpha-synuclein rescues memory and motor deficits and attenuates alpha-synuclein pathology in mouse model of Parkinson's disease*. Neurobiol Dis, 2019. **124**: p. 202-217.
35. Finkelstein, D.I., et al., *Clioquinol Improves Cognitive, Motor Function, and Microanatomy of the Alpha-Synuclein hA53T Transgenic Mice*. ACS Chem Neurosci, 2016. **7**(1): p. 119-29.
36. Oaks, A.W., et al., *Age-dependent effects of A53T alpha-synuclein on behavior and dopaminergic function*. PLoS One, 2013. **8**(4): p. e60378.
37. Sardi, S.P., et al., *Glucosylceramide synthase inhibition alleviates aberrations in synucleinopathy models*. Proc Natl Acad Sci U S A, 2017. **114**(10): p. 2699-2704.
38. Wu, Q., et al., *Chronic mild stress accelerates the progression of Parkinson's disease in A53T  $\alpha$ -synuclein transgenic mice*. Exp Neurol, 2016. **285**(Pt A): p. 61-71.
39. Rothman, S.M., et al., *Neuronal expression of familial Parkinson's disease A53T alpha-synuclein causes early motor impairment, reduced anxiety and potential sleep disturbances in mice*. J Parkinsons Dis, 2013. **3**(2): p. 215-29.
40. Tatenhorst, L., et al., *Fasudil attenuates aggregation of alpha-synuclein in models of Parkinson's disease*. Acta Neuropathol Commun, 2016. **4**: p. 39.
41. Hallett, P.J., et al., *alpha-Synuclein overexpressing transgenic mice show internal organ pathology and autonomic deficits*. Neurobiol Dis, 2012. **47**(2): p. 258-67.
42. Yamakado, H., et al., *alpha-Synuclein BAC transgenic mice as a model for Parkinson's disease manifested decreased anxiety-like behavior and hyperlocomotion*. Neurosci Res, 2012. **73**(2): p. 173-7.
43. Mandler, M., et al., *Next-generation active immunization approach for synucleinopathies: implications for Parkinson's disease clinical trials*. Acta Neuropathol, 2014. **127**(6): p. 861-79.
44. Wassouf, Z., et al., *Distinct Stress Response and Altered Striatal Transcriptome in Alpha-Synuclein Overexpressing Mice*. Front Neurosci, 2018. **12**: p. 1033.
45. Subramaniam, S.R., et al., *Chronic nicotine improves cognitive and social impairment in mice overexpressing wild type alpha-synuclein*. Neurobiol Dis, 2018. **117**: p. 170-180.
46. Brown, J.M., et al., *Intranasal Carnosine Mitigates alpha-Synuclein Pathology and Motor Dysfunction in the Thy1-aSyn Mouse Model of Parkinson's Disease*. ACS Chem Neurosci, 2021. **12**(13): p. 2347-2359.
47. Games, D., et al., *Reducing C-terminal-truncated alpha-synuclein by immunotherapy attenuates neurodegeneration and propagation in Parkinson's disease-like models*. J Neurosci, 2014. **34**(28): p. 9441-54.

48. Schwab, K., et al., *A Protein Aggregation Inhibitor, Leuco-Methylthioninium Bis(Hydromethanesulfonate), Decreases alpha-Synuclein Inclusions in a Transgenic Mouse Model of Synucleinopathy*. Front Mol Neurosci, 2017. **10**: p. 447.
49. Wang, L., et al., *Mice overexpressing wild-type human alpha-synuclein display alterations in colonic myenteric ganglia and defecation*. Neurogastroenterol Motil, 2012. **24**(9): p. e425-36.
50. McDowell, K.A., et al., *Sleep dysfunction and EEG alterations in mice overexpressing alpha-synuclein*. J Parkinsons Dis, 2014. **4**(3): p. 531-539.
51. Bermudez, M.L., K.B. Seroogy, and M.B. Genter, *Evaluation of Carnosine Intervention in the Thy1-aSyn Mouse Model of Parkinson's Disease*. Neuroscience, 2019. **411**: p. 270-278.
52. Biju, K.C., et al., *Reduced cerebral blood flow in an alpha-synuclein transgenic mouse model of Parkinson's disease*. J Cereb Blood Flow Metab, 2020. **40**(12): p. 2441-2453.
53. Fleming, S.M., et al., *Olfactory deficits in mice overexpressing human wildtype alpha-synuclein*. Eur J Neurosci, 2008. **28**(2): p. 247-56.
54. Fleming, S.M., et al., *A pilot trial of the microtubule-interacting peptide (NAP) in mice overexpressing alpha-synuclein shows improvement in motor function and reduction of alpha-synuclein inclusions*. Mol Cell Neurosci, 2011. **46**(3): p. 597-606.
55. Fleming, S.M., et al., *Impaired baroreflex function in mice overexpressing alpha-synuclein*. Front Neurol, 2013. **4**: p. 103.
56. Magen, I., et al., *Cognitive deficits in a mouse model of pre-manifest Parkinson's disease*. Eur J Neurosci, 2012. **35**(6): p. 870-82.
57. Torres, E.R.S., et al., *Alpha-synuclein pathology, microgliosis, and parvalbumin neuron loss in the amygdala associated with enhanced fear in the Thy1-aSyn model of Parkinson's disease*. Neurobiol Dis, 2021. **158**: p. 105478.
58. Wang, L., et al., *Abnormal colonic motility in mice overexpressing human wild-type alpha-synuclein*. Neuroreport, 2008. **19**(8): p. 873-6.
59. Li, R., et al., *Piperine promotes autophagy flux by P2RX4 activation in SNCA/alpha-synuclein-induced Parkinson disease model*. Autophagy, 2022. **18**(3): p. 559-575.
60. Grant, L.M., et al., *Vocalization deficits in mice over-expressing alpha-synuclein, a model of pre-manifest Parkinson's disease*. Behav Neurosci, 2014. **128**(2): p. 110-21.
61. Keane, P.C., et al., *Trichloroethylene and its metabolite TaClo lead to degeneration of substantia nigra dopaminergic neurones: Effects in wild type and human A30P mutant alpha-synuclein mice*. Neurosci Lett, 2019. **711**: p. 134437.
62. Gureviciene, I., K. Gurevicius, and H. Tanila, *Aging and alpha-synuclein affect synaptic plasticity in the dentate gyrus*. J Neural Transm (Vienna), 2009. **116**(1): p. 13-22.
63. Marxreiter, F., et al., *Glial A30P alpha-synuclein pathology segregates neurogenesis from anxiety-related behavior in conditional transgenic mice*. Neurobiol Dis, 2013. **59**: p. 38-51.
64. Schell, H., et al., *Impaired c-Fos and polo-like kinase 2 induction in the limbic system of fear-conditioned alpha-synuclein transgenic mice*. PLoS One, 2012. **7**(11): p. e50245.
65. Neuner, J., et al., *A30P alpha-Synuclein interferes with the stable integration of adult-born neurons into the olfactory network*. Sci Rep, 2014. **4**: p. 3931.
66. Freichel, C., et al., *Age-dependent cognitive decline and amygdala pathology in alpha-synuclein transgenic mice*. Neurobiol Aging, 2007. **28**(9): p. 1421-35.



67. Stylianou, M., et al., *Early Disruption of Cortical Sleep-Related Oscillations in a Mouse Model of Dementia With Lewy Bodies (DLB) Expressing Human Mutant (A30P) Alpha-Synuclein*. Front Neurosci, 2020. **14**: p. 579867.
68. Gries, M., et al., *Parkinson mice show functional and molecular changes in the gut long before motoric disease onset*. Mol Neurodegener, 2021. **16**(1): p. 34.
69. Langley, M.R., et al., *Characterization of nonmotor behavioral impairments and their neurochemical mechanisms in the MitoPark mouse model of progressive neurodegeneration in Parkinson's disease*. Exp Neurol, 2021. **341**: p. 113716.
70. Li, X., et al., *Cognitive dysfunction precedes the onset of motor symptoms in the MitoPark mouse model of Parkinson's disease*. PLoS One, 2013. **8**(8): p. e71341.
71. Cong, L., et al., *Multimodal MRI Evaluation of the MitoPark Mouse Model of Parkinson's Disease*. PLoS One, 2016. **11**(3): p. e0151884.
72. Ghaisas, S., et al., *MitoPark transgenic mouse model recapitulates the gastrointestinal dysfunction and gut-microbiome changes of Parkinson's disease*. Neurotoxicology, 2019. **75**: p. 186-199.
73. Fifel, K. and H.M. Cooper, *Loss of dopamine disrupts circadian rhythms in a mouse model of Parkinson's disease*. Neurobiol Dis, 2014. **71**: p. 359-69.
74. Pass, T., et al., *The Impact of Mitochondrial Dysfunction on Dopaminergic Neurons in the Olfactory Bulb and Odor Detection*. Mol Neurobiol, 2020. **57**(9): p. 3646-3657.
75. Langley, M.R., et al., *Manganese exposure exacerbates progressive motor deficits and neurodegeneration in the MitoPark mouse model of Parkinson's disease: Relevance to gene and environment interactions in metal neurotoxicity*. Neurotoxicology, 2018. **64**: p. 240-255.
76. Baumann, A., et al., *Preliminary Evidence of Apathetic-Like Behavior in Aged Vesicular Monoamine Transporter 2 Deficient Mice*. Front Hum Neurosci, 2016. **10**: p. 587.
77. Cui, K., et al., *Restoration of Noradrenergic Function in Parkinson's Disease Model Mice*. ASN Neuro, 2021. **13**: p. 17590914211009730.
78. Taylor, T.N., et al., *Nonmotor symptoms of Parkinson's disease revealed in an animal model with reduced monoamine storage capacity*. J Neurosci, 2009. **29**(25): p. 8103-13.
79. Rabl, R., et al., *Early start of progressive motor deficits in Line 61 alpha-synuclein transgenic mice*. BMC Neurosci, 2017. **18**(1): p. 22.
80. Gabrielyan, L., et al., *Behavioral Deficits and Brain alpha-Synuclein and Phosphorylated Serine-129 alpha-Synuclein in Male and Female Mice Overexpressing Human alpha-Synuclein*. J Alzheimers Dis, 2021. **79**(2): p. 875-893.
81. Goldberg, N.R.S., et al., *Neural Stem Cells Rescue Cognitive and Motor Dysfunction in a Transgenic Model of Dementia with Lewy Bodies through a BDNF-Dependent Mechanism*. Stem Cell Reports, 2015. **5**(5): p. 791-804.
82. Lim, J., et al., *LRRK2 G2019S Induces Anxiety/Depression-like Behavior before the Onset of Motor Dysfunction with 5-HT1A Receptor Upregulation in Mice*. J Neurosci, 2018. **38**(7): p. 1611-1621.
83. Matikainen-Ankney, B.A., et al., *Parkinson's Disease-Linked LRRK2-G2019S Mutation Alters Synaptic Plasticity and Promotes Resilience to Chronic Social Stress in Young Adulthood*. J Neurosci, 2018. **38**(45): p. 9700-9711.
84. Volta, M., et al., *Chronic and acute LRRK2 silencing has no long-term behavioral effects, whereas wild-type and mutant LRRK2 overexpression induce motor and cognitive deficits and altered regulation of dopamine release*. Parkinsonism Relat Disord, 2015. **21**(10): p. 1156-63.

85. Crown, L.M., et al., *Sleep Spindles and Fragmented Sleep as Prodromal Markers in a Preclinical Model of LRRK2-G2019S Parkinson's Disease*. Front Neurol, 2020. **11**: p. 324.
86. Adeosun, S.O., et al., *Human LRRK2 G2019S mutation represses post-synaptic protein PSD95 and causes cognitive impairment in transgenic mice*. Neurobiol Learn Mem, 2017. **142**(Pt B): p. 182-189.
87. Glasl, L., et al., *Pink1-deficiency in mice impairs gait, olfaction and serotonergic innervation of the olfactory bulb*. Exp Neurol, 2012. **235**(1): p. 214-27.
88. Maynard, M.E., et al., *Loss of PTEN-induced kinase 1 (Pink1) reduces hippocampal tyrosine hydroxylase and impairs learning and memory*. Exp Neurol, 2020. **323**: p. 113081.
89. Agnihotri, S.K., et al., *PINK1 deficiency is associated with increased deficits of adult hippocampal neurogenesis and lowers the threshold for stress-induced depression in mice*. Behav Brain Res, 2019. **363**: p. 161-172.
90. Ferris, C.F., et al., *Evidence of Neurobiological Changes in the Presymptomatic PINK1 Knockout Rat*. J Parkinsons Dis, 2018. **8**(2): p. 281-301.
91. Hoffmeister, J.D., C.A. Kelm-Nelson, and M.R. Ciucci, *Quantification of brainstem norepinephrine relative to vocal impairment and anxiety in the Pink1-/- rat model of Parkinson disease*. Behav Brain Res, 2021. **414**: p. 113514.
92. Marquis, J.M., S.E. Lettenberger, and C.A. Kelm-Nelson, *Early-onset Parkinsonian behaviors in female Pink1-/- rats*. Behav Brain Res, 2020. **377**: p. 112175.
93. Billia, F., et al., *PTEN-inducible kinase 1 (PINK1)/Park6 is indispensable for normal heart function*. Proc Natl Acad Sci U S A, 2011. **108**(23): p. 9572-7.
94. Beauchamp, L.C., et al., *Ablation of tau causes an olfactory deficit in a murine model of Parkinson's disease*. Acta Neuropathol Commun, 2018. **6**(1): p. 57.
95. Li, Z., et al., *Seizure resistance without parkinsonism in aged mice after tau reduction*. Neurobiol Aging, 2014. **35**(11): p. 2617-2624.
96. Lei, P., et al., *Tau deficiency induces parkinsonism with dementia by impairing APP-mediated iron export*. Nat Med, 2012. **18**(2): p. 291-5.
97. Lei, P., et al., *Motor and cognitive deficits in aged tau knockout mice in two background strains*. Mol Neurodegener, 2014. **9**: p. 29.
98. Morris, M., et al., *Age-appropriate cognition and subtle dopamine-independent motor deficits in aged tau knockout mice*. Neurobiol Aging, 2013. **34**(6): p. 1523-9.
99. Dongworth, R.K., et al., *DJ-1 protects against cell death following acute cardiac ischemia-reperfusion injury*. Cell Death Dis, 2014. **5**: p. e1082.
100. Pham, T.T., et al., *DJ-1-deficient mice show less TH-positive neurons in the ventral tegmental area and exhibit non-motoric behavioural impairments*. Genes Brain Behav, 2010. **9**(3): p. 305-17.
101. Li, M., et al., *Impaired D2 receptor-dependent dopaminergic transmission in prefrontal cortex of awake mouse model of Parkinson's disease*. Brain, 2019. **142**(10): p. 3099-3115.
102. Billia, F., et al., *Parkinson-susceptibility gene DJ-1/PARK7 protects the murine heart from oxidative damage in vivo*. Proc Natl Acad Sci U S A, 2013. **110**(15): p. 6085-90.
103. Kyser, T.L., et al., *Characterization of Motor and Non-Motor Behavioral Alterations in the Dj-1 (PARK7) Knockout Rat*. J Mol Neurosci, 2019. **69**(2): p. 298-311.
104. Liu, Q., et al., *An unexpected improvement in spatial learning and memory ability in alpha-synuclein A53T transgenic mice*. J Neural Transm (Vienna), 2018. **125**(2): p. 203-210.

105. Uemura, N., et al., *alpha-Synuclein Spread from Olfactory Bulb Causes Hyposmia, Anxiety, and Memory Loss in BAC-SNCA Mice*. *Mov Disord*, 2021. **36**(9): p. 2036-2047.
106. Hamill, R.W., et al., *Autonomic dysfunction and plasticity in micturition reflexes in human alpha-synuclein mice*. *Dev Neurobiol*, 2012. **72**(6): p. 918-36.
107. La Vitola, P., et al., *Peripheral inflammation exacerbates alpha-synuclein toxicity and neuropathology in Parkinson's models*. *Neuropathol Appl Neurobiol*, 2021. **47**(1): p. 43-60.
108. Tikhonova, M.A., et al., *Effects of Grape Polyphenols on the Life Span and Neuroinflammatory Alterations Related to Neurodegenerative Parkinson Disease-Like Disturbances in Mice*. *Molecules*, 2020. **25**(22).
109. Giesert, F., et al., *The pathogenic LRRK2 R1441C mutation induces specific deficits modeling the prodromal phase of Parkinson's disease in the mouse*. *Neurobiol Dis*, 2017. **105**: p. 179-193.
110. Bichler, Z., et al., *Non-motor and motor features in LRRK2 transgenic mice*. *PLoS One*, 2013. **8**(7): p. e70249.
111. Mikhail, F., et al., *Lack of exacerbation of neurodegeneration in a double transgenic mouse model of mutant LRRK2 and tau*. *Hum Mol Genet*, 2015. **24**(12): p. 3545-56.
112. Dranka, B.P., et al., *A novel mitochondrially-targeted apocynin derivative prevents hyposmia and loss of motor function in the leucine-rich repeat kinase 2 (LRRK2(R1441G)) transgenic mouse model of Parkinson's disease*. *Neurosci Lett*, 2014. **583**: p. 159-64.
113. Lopatina, O., et al., *Anxiety- and depression-like behavior in mice lacking the CD157/BST1 gene, a risk factor for Parkinson's disease*. *Front Behav Neurosci*, 2014. **8**: p. 133.
114. Mizuno, A., et al., *Lipo-oxytocin-1, a Novel Oxytocin Analog Conjugated with Two Palmitoyl Groups, Has Long-Lasting Effects on Anxiety-Related Behavior and Social Avoidance in CD157 Knockout Mice*. *Brain Sci*, 2015. **5**(1): p. 3-13.
115. Kasai, S., et al., *Selegiline Ameliorates Depression-Like Behavior in Mice Lacking the CD157/BST1 Gene, a Risk Factor for Parkinson's Disease*. *Front Behav Neurosci*, 2017. **11**: p. 75.
116. Higashida, H., et al., *An immunohistochemical, enzymatic, and behavioral study of CD157/BST-1 as a neuroregulator*. *BMC Neurosci*, 2017. **18**(1): p. 35.
117. Maekawa, T., et al., *Leucine-Rich Repeat Kinase 2 Is Associated With Activation of the Paraventricular Nucleus of the Hypothalamus and Stress-Related Gastrointestinal Dysmotility*. *Front Neurosci*, 2019. **13**: p. 905.
118. Beccano-Kelly, D.A., et al., *LRRK2 overexpression alters glutamatergic presynaptic plasticity, striatal dopamine tone, postsynaptic signal transduction, motor activity and memory*. *Hum Mol Genet*, 2015. **24**(5): p. 1336-49.
119. Maset, A., et al., *Aberrant Patterns of Sensory-Evoked Activity in the Olfactory Bulb of LRRK2 Knockout Mice*. *Cells*, 2021. **10**(11).
120. Navarro, P., et al., *Memory and exploratory impairment in mice that lack the Park-2 gene and that over-express the human FTDP-17 mutant Tau*. *Behav Brain Res*, 2008. **189**(2): p. 350-6.
121. Zhu, X.R., et al., *Non-motor behavioural impairments in parkin-deficient mice*. *Eur J Neurosci*, 2007. **26**(7): p. 1902-11.
122. Rial, D., et al., *Behavioral phenotyping of Parkin-deficient mice: looking for early preclinical features of Parkinson's disease*. *PLoS One*, 2014. **9**(12): p. e114216.

123. Itier, J.M., et al., *Parkin gene inactivation alters behaviour and dopamine neurotransmission in the mouse*. Hum Mol Genet, 2003. **12**(18): p. 2277-91.
124. Perez, F.A. and R.D. Palmiter, *Parkin-deficient mice are not a robust model of parkinsonism*. Proc Natl Acad Sci U S A, 2005. **102**(6): p. 2174-9.
125. Kubli, D.A., et al., *Parkin protein deficiency exacerbates cardiac injury and reduces survival following myocardial infarction*. J Biol Chem, 2013. **288**(2): p. 915-26.
126. Hollville, E., et al., *Characterization of a Cul9-Parkin double knockout mouse model for Parkinson's disease*. Sci Rep, 2020. **10**(1): p. 16886.
127. Pavia-Collado, R., et al., *Intracerebral Administration of a Ligand-ASO Conjugate Selectively Reduces alpha-Synuclein Accumulation in Monoamine Neurons of Double Mutant Human A30P\*A53T\*alpha-Synuclein Transgenic Mice*. Int J Mol Sci, 2021. **22**(6).
128. Lelan, F., et al., *Effects of Human Alpha-Synuclein A53T-A30P Mutations on SVZ and Local Olfactory Bulb Cell Proliferation in a Transgenic Rat Model of Parkinson Disease*. Parkinsons Dis, 2011. **2011**: p. 987084.
129. Ikuno, M., et al., *GBA haploinsufficiency accelerates alpha-synuclein pathology with altered lipid metabolism in a prodromal model of Parkinson's disease*. Hum Mol Genet, 2019. **28**(11): p. 1894-1904.
130. Hosford, P.S., et al., *Synuclein Deficiency Results in Age-Related Respiratory and Cardiovascular Dysfunctions in Mice*. Brain Sci, 2020. **10**(9).
131. Tian, Y., et al., *Transgenic Mice Expressing Human alpha-Synuclein 1-103 Fragment as a Novel Model of Parkinson's Disease*. Front Aging Neurosci, 2021. **13**: p. 760781.
132. Martinez Hernandez, A., et al., *Low-Expressing Synucleinopathy Mouse Models Based on Oligomer-Forming Mutations and C-Terminal Truncation of alpha-Synuclein*. Front Neurosci, 2021. **15**: p. 643391.
133. Escobar, V.D., et al., *Transgenic mice expressing S129 phosphorylation mutations in alpha-synuclein*. Neurosci Lett, 2014. **563**: p. 96-100.
134. Craven, K.M., et al., *Zinc Exacerbates Tau Pathology in a Tau Mouse Model*. J Alzheimers Dis, 2018. **64**(2): p. 617-630.
135. Lambourne, S.L., et al., *Impairments in impulse control in mice transgenic for the human FTDP-17 tauV337M mutation are exacerbated by age*. Hum Mol Genet, 2007. **16**(14): p. 1708-19.
136. Lambourne, S.L., et al., *Increased tau phosphorylation on mitogen-activated protein kinase consensus sites and cognitive decline in transgenic models for Alzheimer's disease and FTDP-17: evidence for distinct molecular processes underlying tau abnormalities*. Mol Cell Biol, 2005. **25**(1): p. 278-93.
137. Anvret, A., et al., *Adh1 and Adh1/4 knockout mice as possible rodent models for presymptomatic Parkinson's disease*. Behav Brain Res, 2012. **227**(1): p. 252-7.
138. Belin, A.C., et al., *Modeling Parkinson's disease genetics: Altered function of the dopamine system in Adh4 knockout mice*. Behav Brain Res, 2011. **217**(2): p. 439-45.
139. Veenit, V., et al., *The Effect of Early Life Stress on Emotional Behaviors in GPR37KO Mice*. Int J Mol Sci, 2021. **23**(1).
140. Mandillo, S., et al., *Mice lacking the Parkinson's related GPR37/PAEL receptor show non-motor behavioral phenotypes: age and gender effect*. Genes Brain Behav, 2013. **12**(4): p. 465-77.
141. Morgan, R.G., et al., *Relative contributions of severe dopaminergic neuron ablation and dopamine depletion to cognitive impairment*. Exp Neurol, 2015. **271**: p. 205-14.

142. Buhusi, M., et al., *Stress-Induced Executive Dysfunction in GDNF-Deficient Mice, A Mouse Model of Parkinsonism*. Front Behav Neurosci, 2016. **10**: p. 114.
143. Prediger, R.D., et al., *Mice with genetic deletion of the heparin-binding growth factor midkine exhibit early preclinical features of Parkinson's disease*. J Neural Transm (Vienna), 2011. **118**(8): p. 1215-25.
144. Jiang, S., et al., *Alterations of the Motor and Olfactory Functions Related to Parkinson's Disease in Transgenic Mice With a VMAT2-Deficiency in Dopaminergic Neurons*. Front Neurosci, 2020. **14**: p. 356.
145. Sonnier, L., et al., *Progressive loss of dopaminergic neurons in the ventral midbrain of adult mice heterozygote for Engrailed1*. J Neurosci, 2007. **27**(5): p. 1063-71.
146. Wu, G., et al., *Mice deficient in GM1 manifest both motor and non-motor symptoms of Parkinson's disease; successful treatment with synthetic GM1 ganglioside*. Exp Neurol, 2020. **329**: p. 113284.
147. Gil-Tommee, C., et al., *Parkinsonian GM2 synthase knockout mice lacking mature gangliosides develop urinary dysfunction and neurogenic bladder*. Exp Neurol, 2019. **311**: p. 265-273.
148. Parrella, E., et al., *NF-kappaB/c-Rel deficiency causes Parkinson's disease-like prodromal symptoms and progressive pathology in mice*. Transl Neurodegener, 2019. **8**: p. 16.
149. Ageta-Ishihara, N., et al., *Chronic overload of SEPT4, a parkin substrate that aggregates in Parkinson's disease, causes behavioral alterations but not neurodegeneration in mice*. Mol Brain, 2013. **6**(35).
150. Havrda, M.C., et al., *Behavioral abnormalities and Parkinson's-like histological changes resulting from Id2 inactivation in mice*. Dis Model Mech, 2013. **6**(3): p. 819-27.
